# Supplementary material for: One-pot synthesis of 2-amino-4(3H)-quinazolinones via ring-opening of isatoic anhydride and palladium-catalyzed oxidative isocyanide-insertion
Source: Royal Society of Chemistry journal article supplement (doi:10.1039/c4ob00484a), 2014-01-01
Supplement: c4ob00484a1.pdf [file c4ob00484a1.pdf]

## Support information

### One-pot Synthesis of 2-Amino-4(3*H*)-Quinazolinones via Ring-opening of Isatoic anhydride with amines and Palladium-catalyzed Oxidative Isocyanide-insertion

Fei Ji,<sup>a</sup> Mei-fang Lv,<sup>a</sup> Wen-bin Yi,<sup>a</sup> Chun Cai<sup>a\*</sup>

<sup>a</sup>Chemical Engineering College, Nanjing University of Science and Technology, Nanjing, China.

Fax: (+86)-25-8431-5030; E-mail: [c.cai@mail.njust.edu.cn](mailto:c.cai@mail.njust.edu.cn)

#### Tables of Content

|                                                                |    |
|----------------------------------------------------------------|----|
| This page.....                                                 | 1  |
| Copies of <sup>1</sup> H, <sup>13</sup> C NMR .....            | 2  |
| X-ray analysis of 2-amino-4(3H)-quinazolinones <b>4j</b> ..... | 25 |

#### Copies of <sup>1</sup>H, <sup>13</sup>C NMR

2013-07-13 1H-9 cdcl3 CC-1258 (JF-1 dianhongsuangan shudingjiyijing bianan)

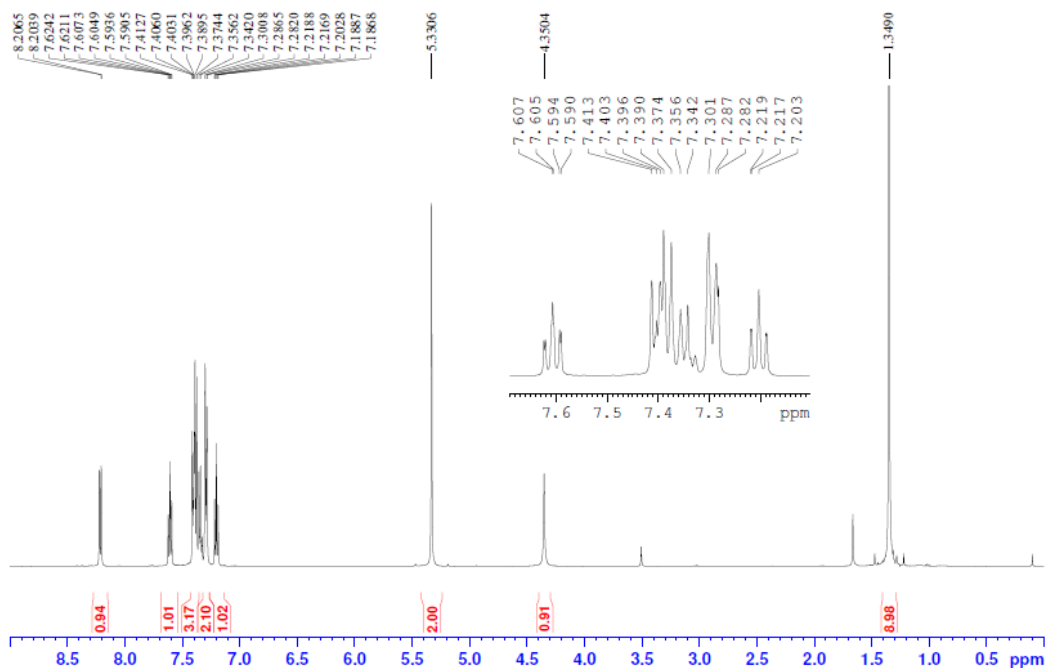

<sup>1</sup>H NMR of compound 4a

2013-7-14 13C-1 cdcl3 CC-343 (jF-1 dianhongsuangan bianan shudingjiyijing)

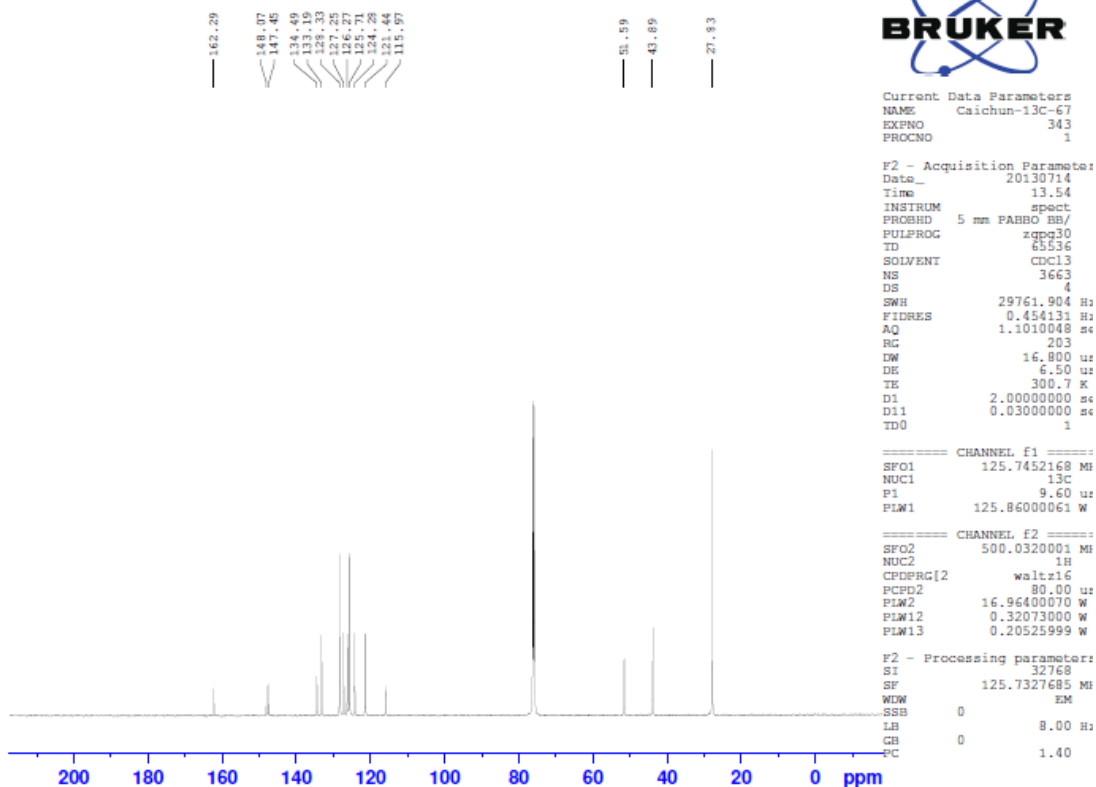

<sup>13</sup>C NMR of compound 4a

2013-3-18 1H-2 CDCL3 CC-33(JF-2)

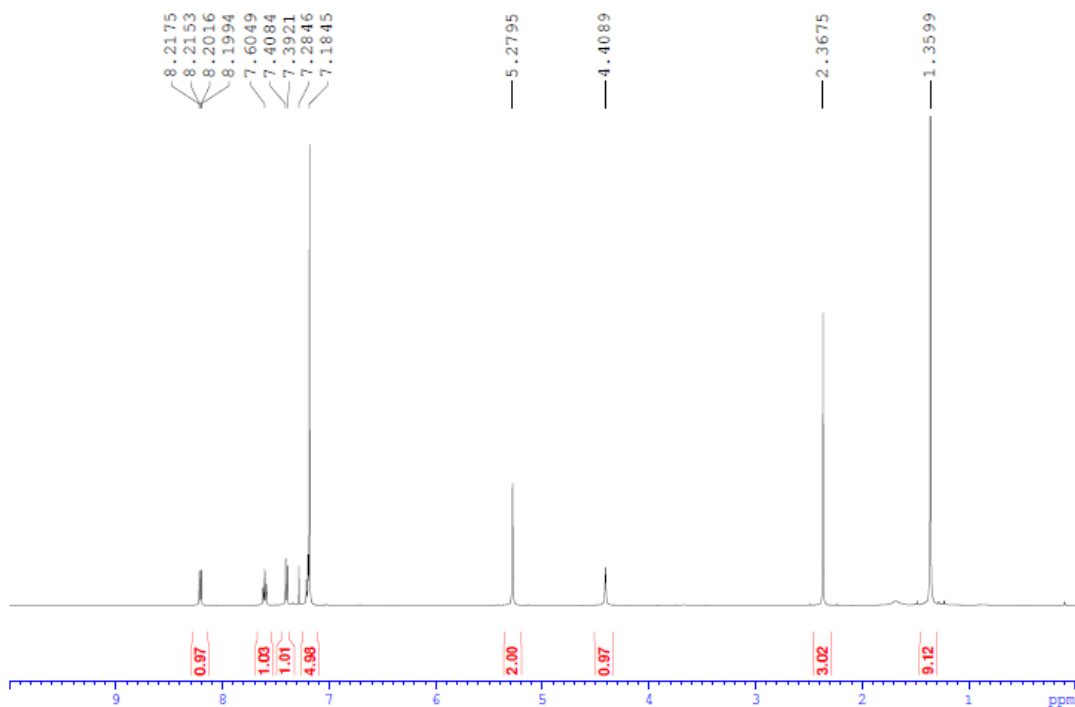

<sup>1</sup>H NMR of compound **4b**

2013-4-20 13C-5 dms0 CC-202(jf-2 dianhongsuangan duijiabianan shudingjiyijing)

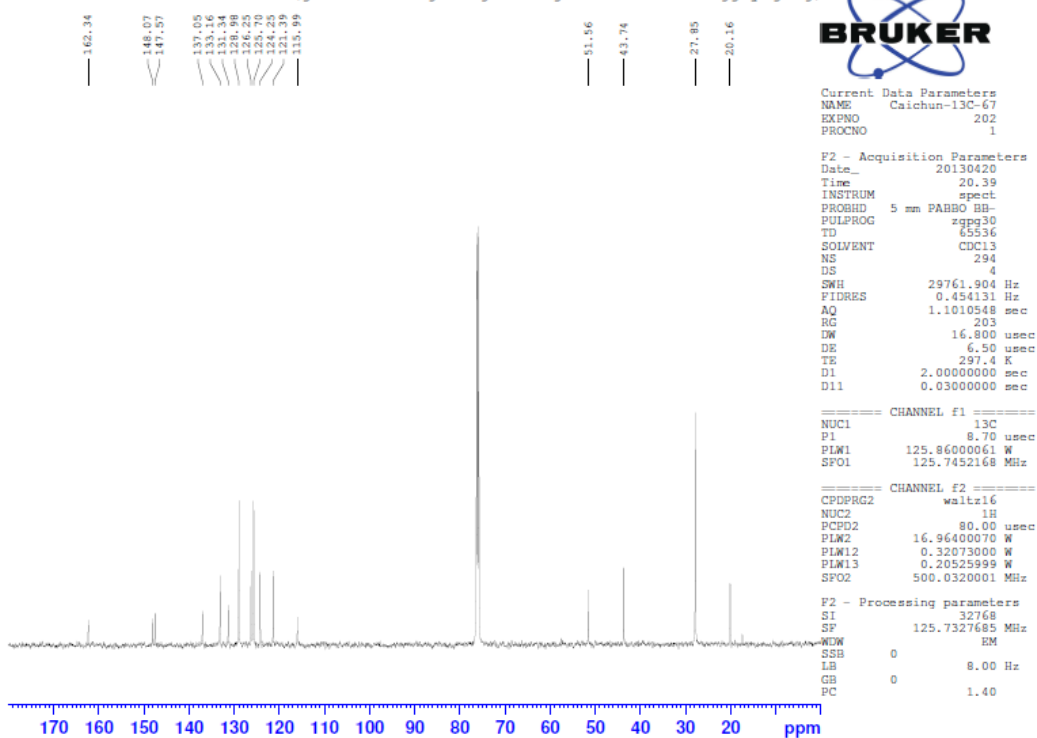

<sup>13</sup>C NMR of compound **4b**

2013-07-23 1H-4 CDCL3 CC-1319 (JF)

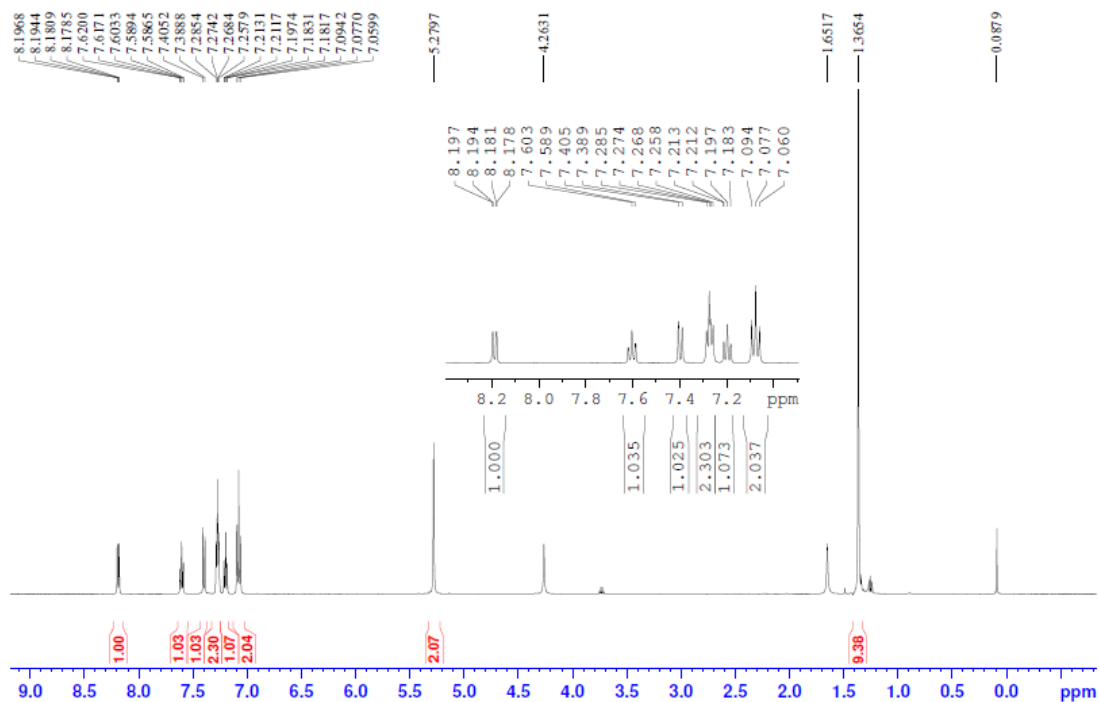

<sup>1</sup>H NMR of compound 4c

2013-7-23 13C-2 cdcl3 CC-365 (jf-duifubianan+shudingjiyijing+dianhongsuangan)

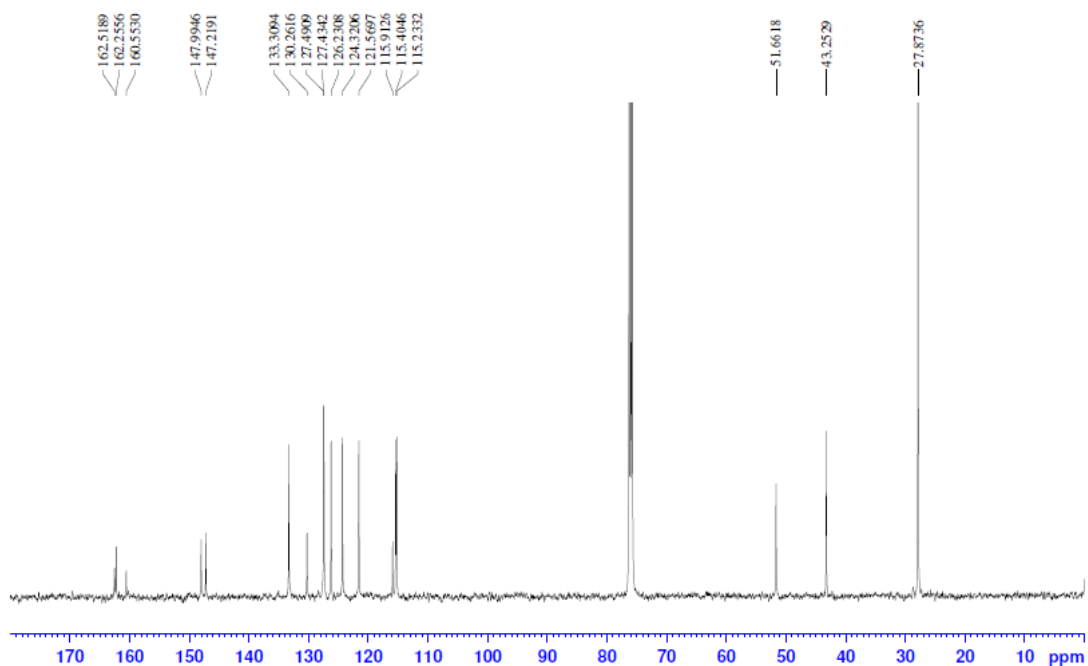

<sup>13</sup>C NMR of compound 4c

2013-07-23 1H-3 CDCL3 CC-1318 (JF-LINFU)

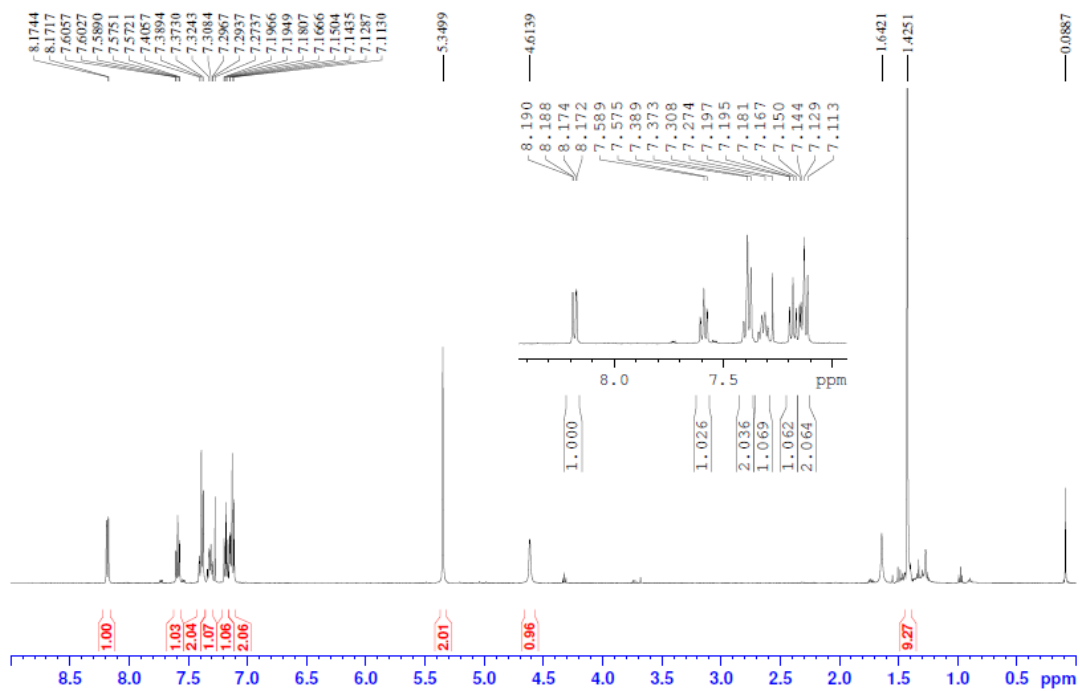

<sup>1</sup>H NMR of compound **4d**

2013-7-24 13C-4 cdc13 CC-370 (jf)

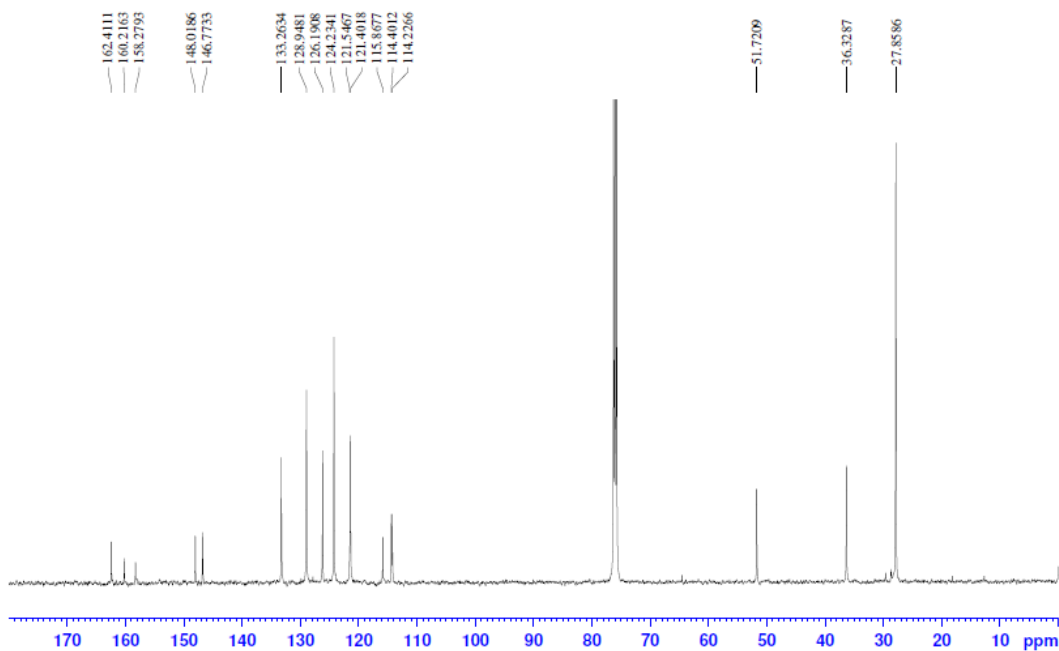

<sup>13</sup>C NMR of compound **4d**

2013-08-22 1H-5 CDCL3 CC-1359 (JF-1)

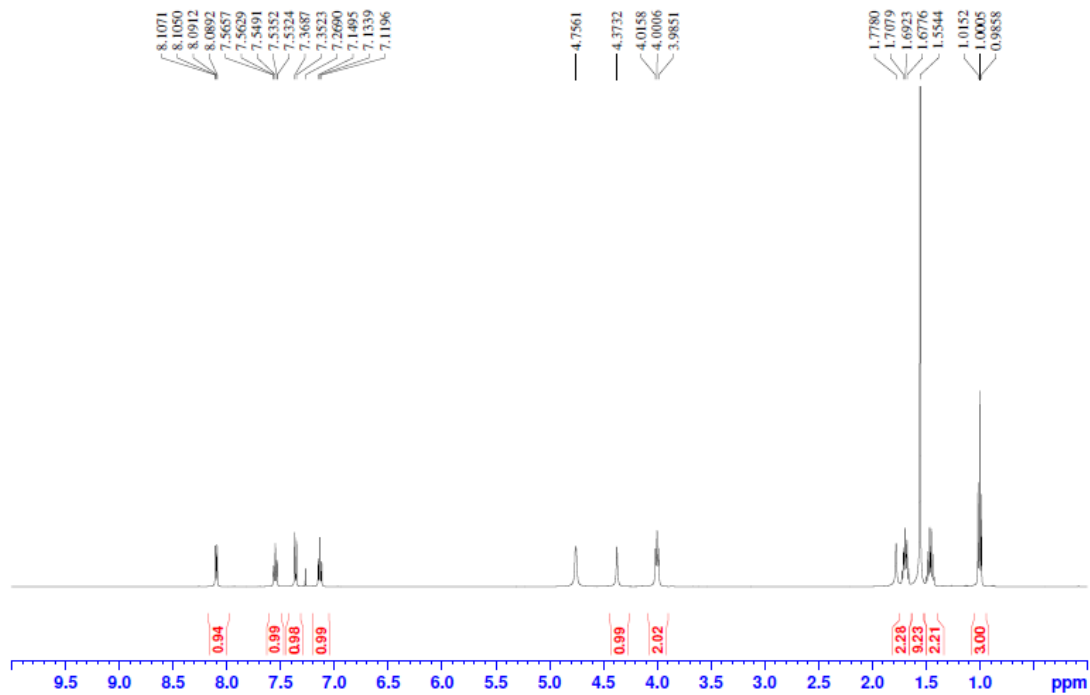

<sup>1</sup>H NMR of compound **4e**

2013-8-22 13C-3 CDCL3 CC-389 (JF-1)

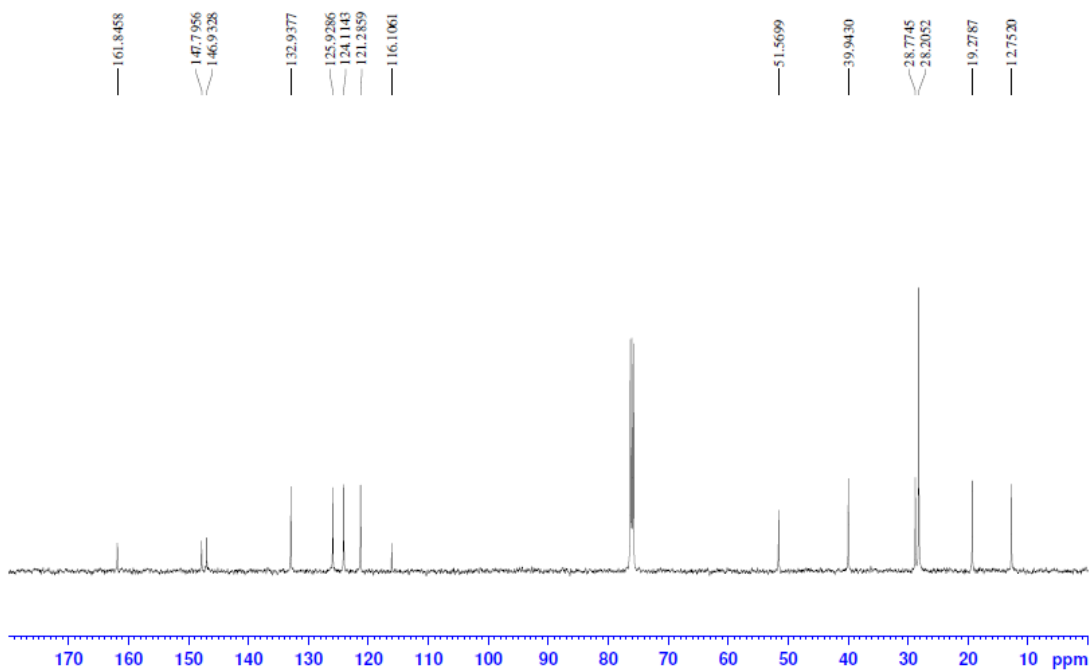

<sup>13</sup>C NMR of compound **4e**

2013-10-20 1H-11 CDCL3 CC-1573 (JF-3 dianhongsuangan Boc-yieran shudingjiyijing)

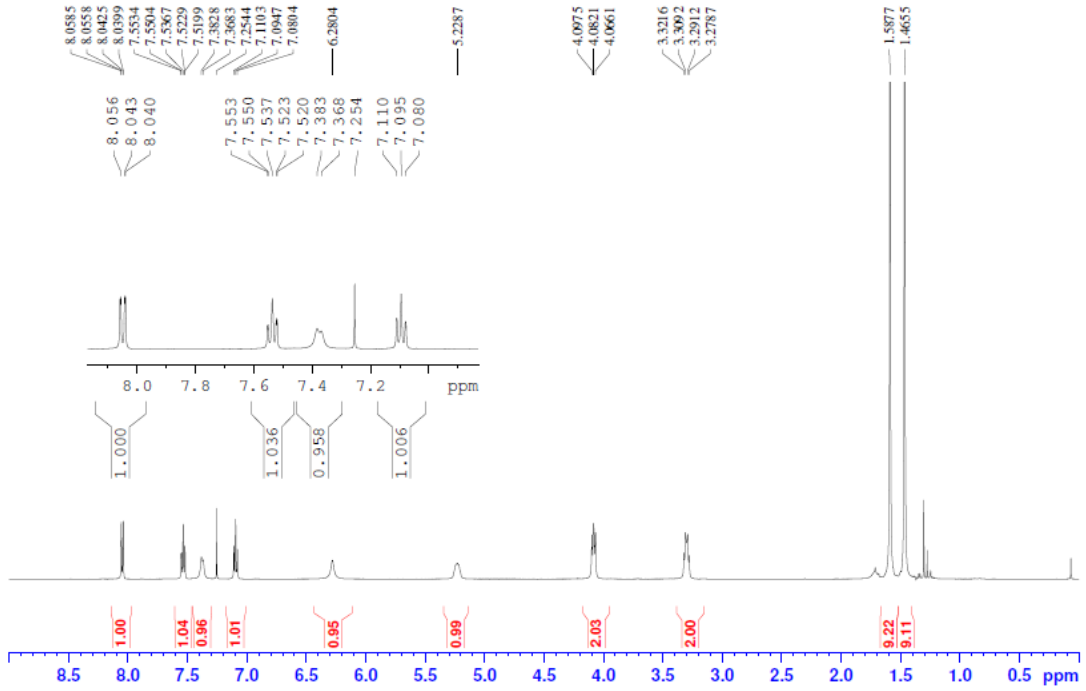

<sup>1</sup>H NMR of compound **4f**

2013-10-20 13C-4 cdcl3 CC-467 (jf-2 dianhongsuangan bocyieran shudingjiyijing)

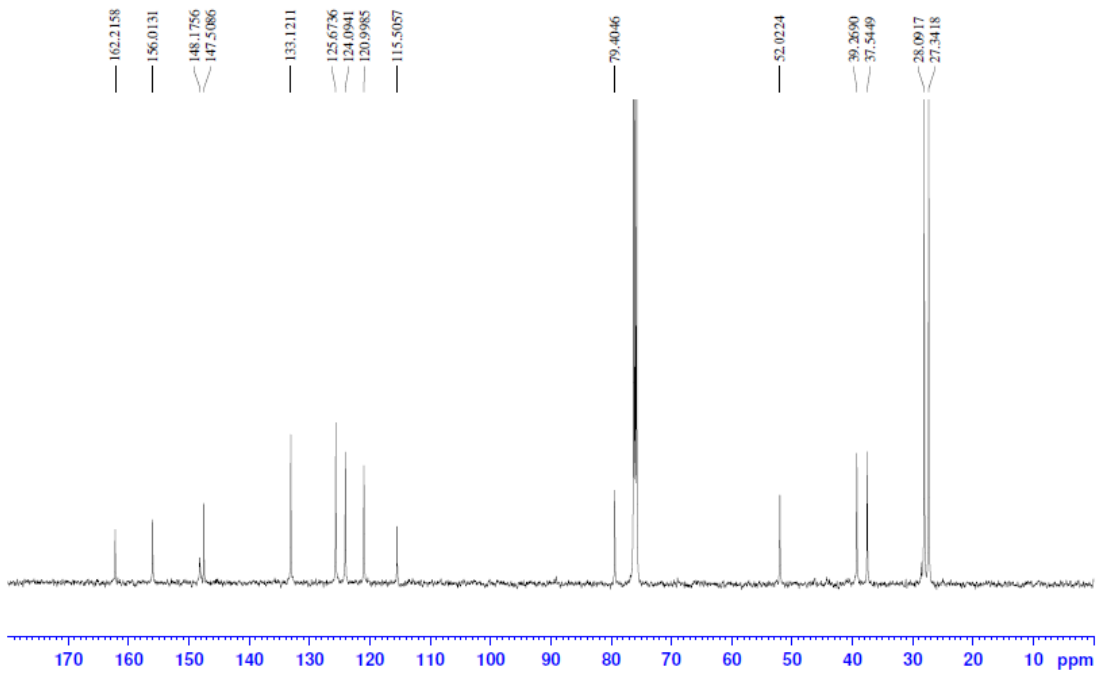

<sup>13</sup>C NMR of compound **4f**

2013-10-20 1H-9 CDCL3 CC-1571 (JF-1 YIBINGAN)

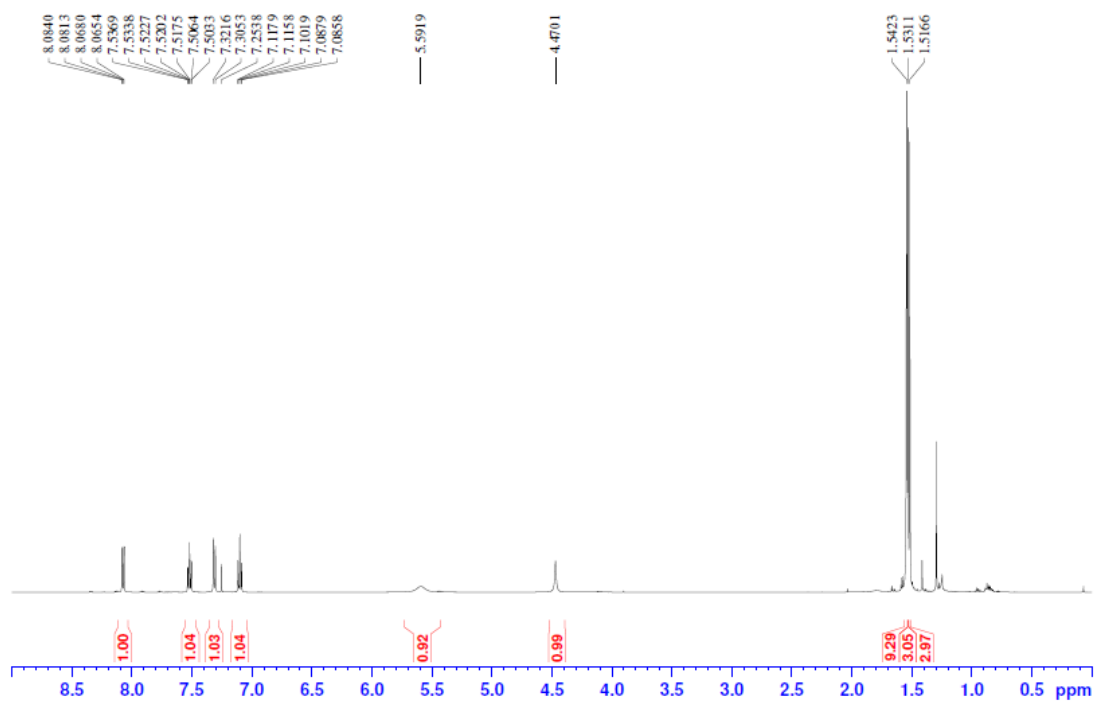

<sup>1</sup>H NMR of compound **4g**

2013-10-20 13C-3 cdcl3 CC-466 (jf-1 dianhongsuangan yibingan shudingjiyijing)

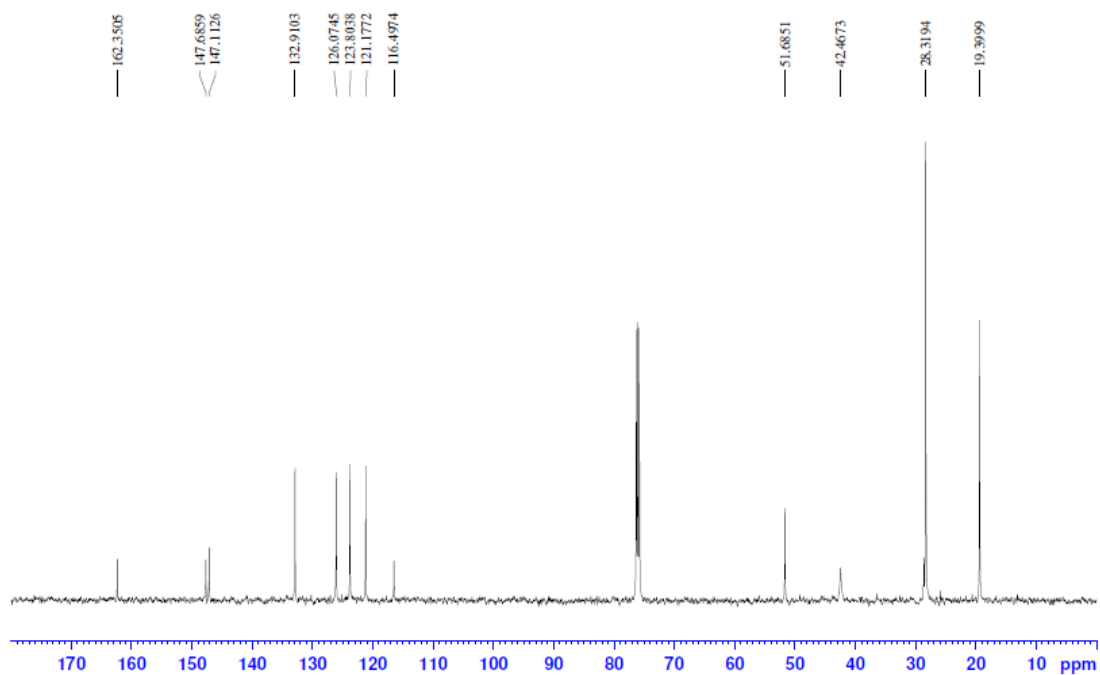

<sup>13</sup>C NMR of compound **4g**



2013-10-26 1H-25 CDCL3 CC-1617(JF yibingan dianhongsuangan huanjijiyijing)

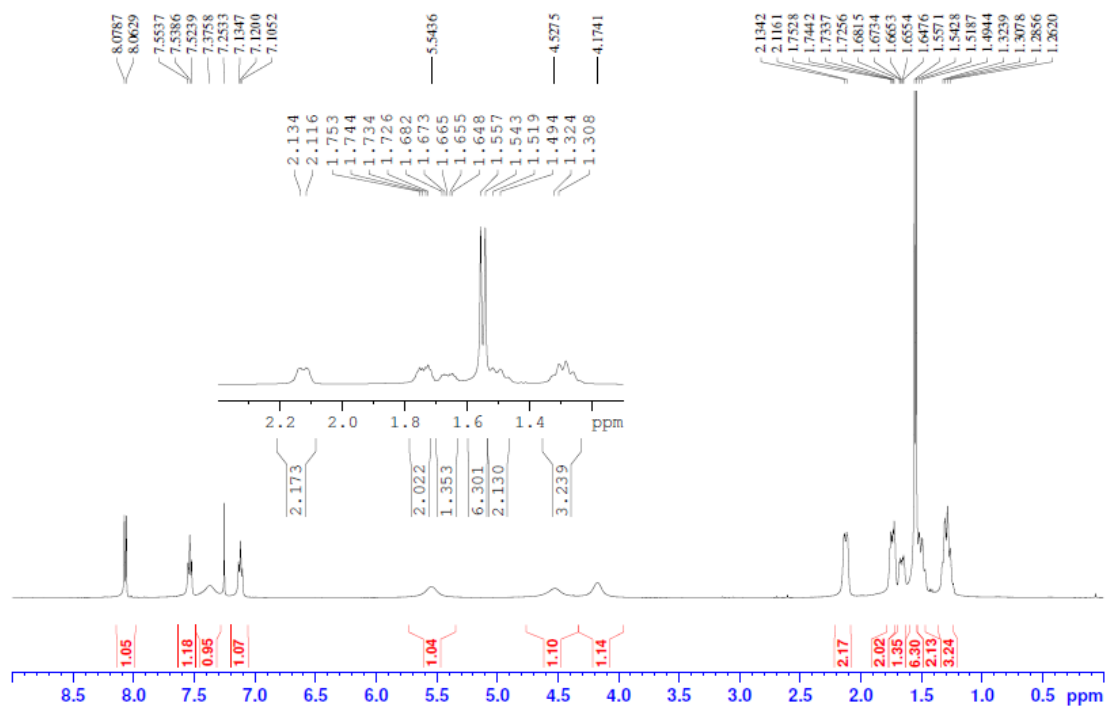

<sup>1</sup>H NMR of compound **4h**

2013-10-26 13C-5 cdc13 CC-477 (jf-1 dianhongsuangan yibingan huanjijiyijing)

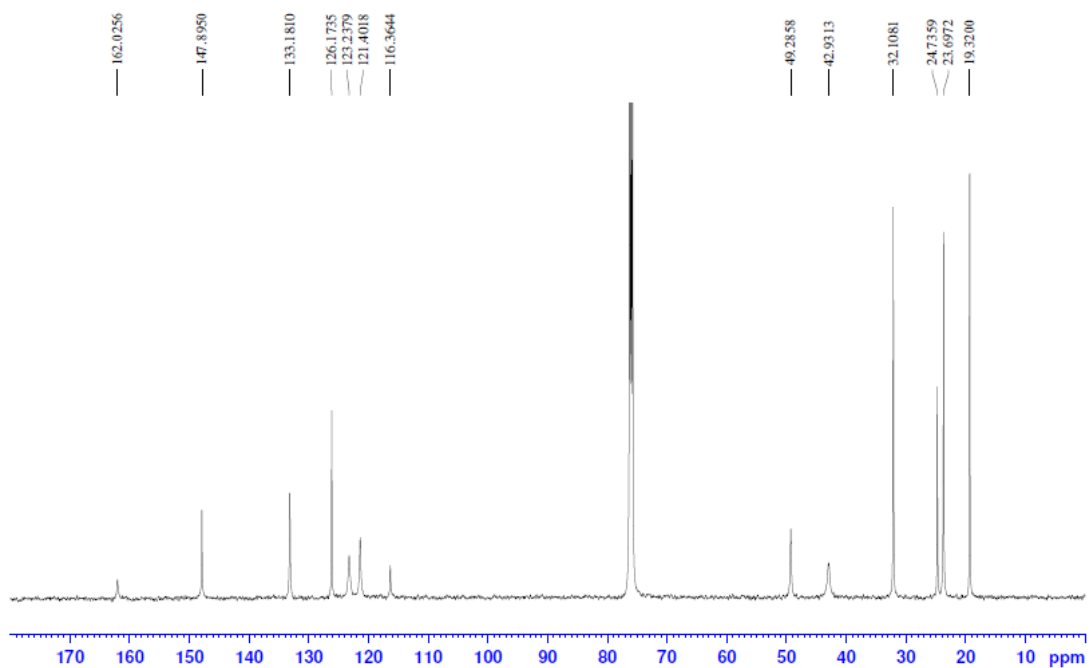

<sup>13</sup>C NMR of compound **4h**

2013-10-19 1H-15 CDCL3 CC-1558 (JF DIANHONGSUANGAN KANGAN SHUDINGJIYIJING)

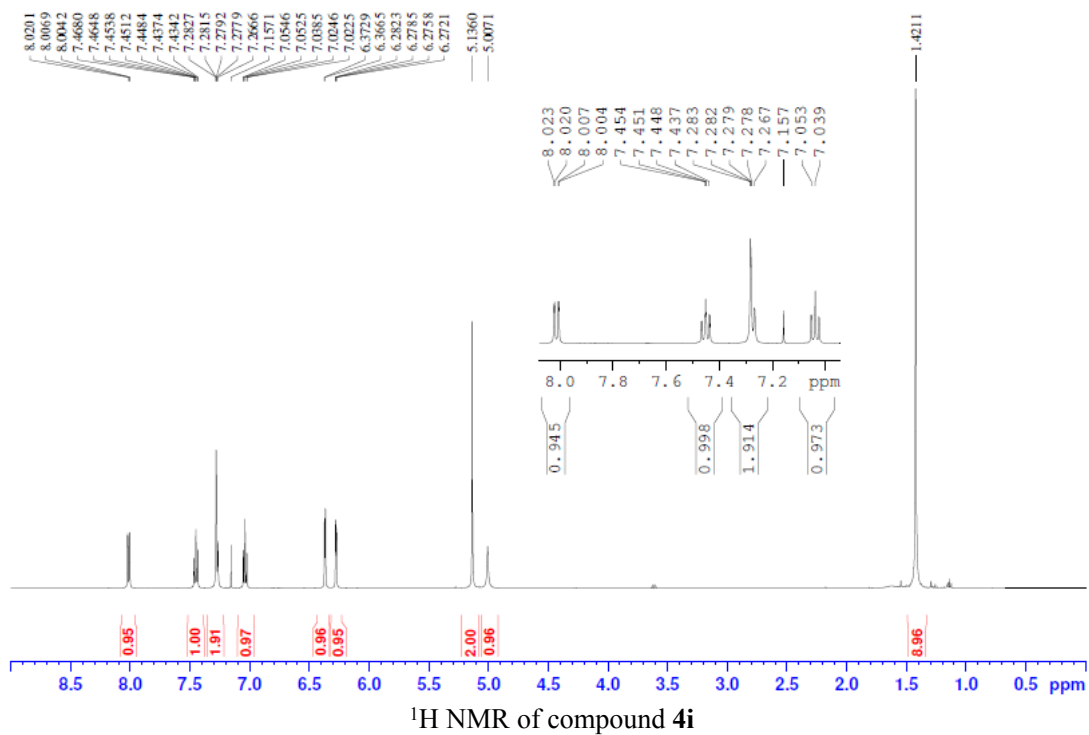

<sup>1</sup>H NMR of compound **4i**

2013-10-19 13C-6 CDCL3 CC-454 (jf-2 dianhongsuangan kangan shudingjiyijing)

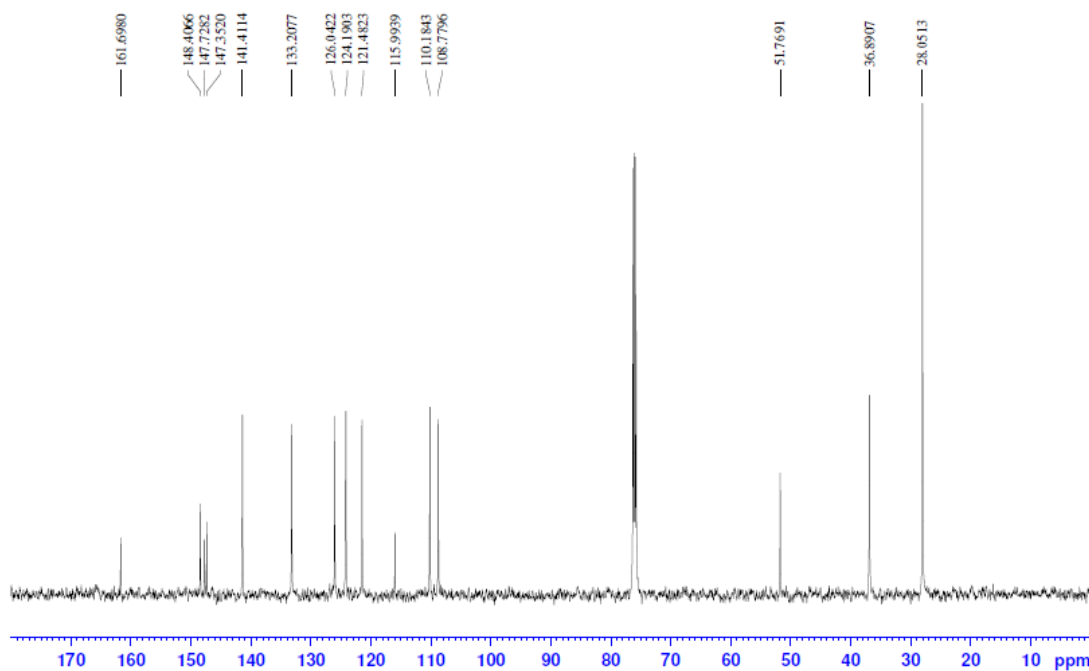

<sup>13</sup>C NMR of compound **4i**

2013-10-12 1H-30 CDCL3 CC-1502 (jf-1 2-jiajikangan dianhongsuangan shudingjiyijing)

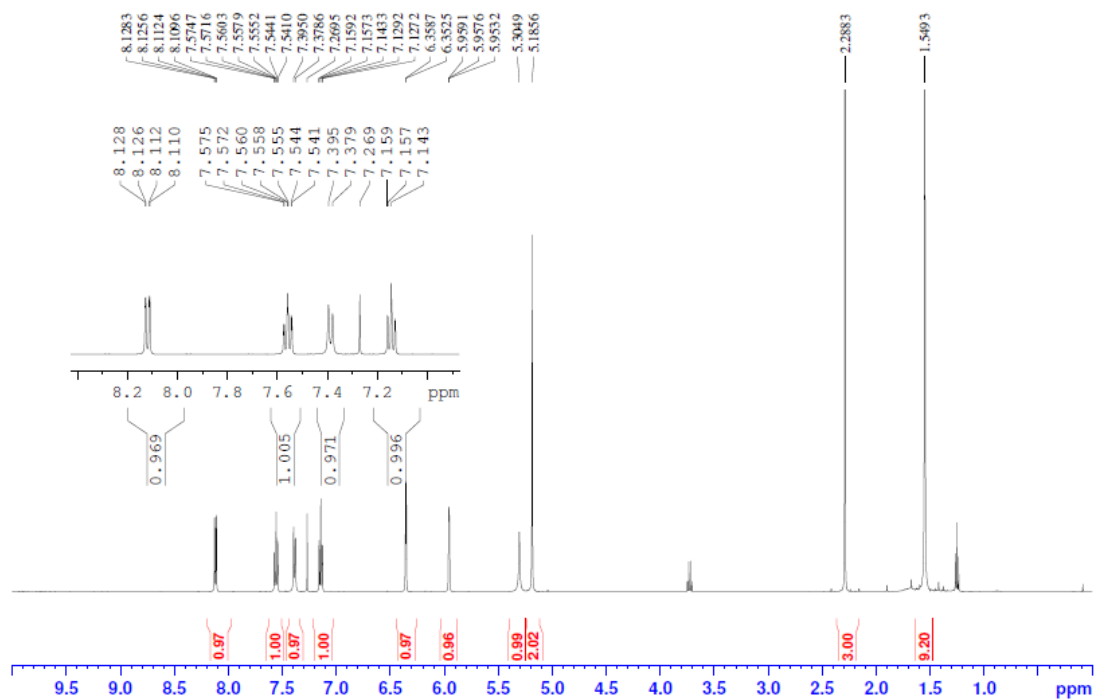

<sup>1</sup>H NMR of compound **4j**

2013-10-12 13C-8 CDCL3 CC-436 (jf-1 2jiajikangan dianhongsuangan shudingjiyijing )

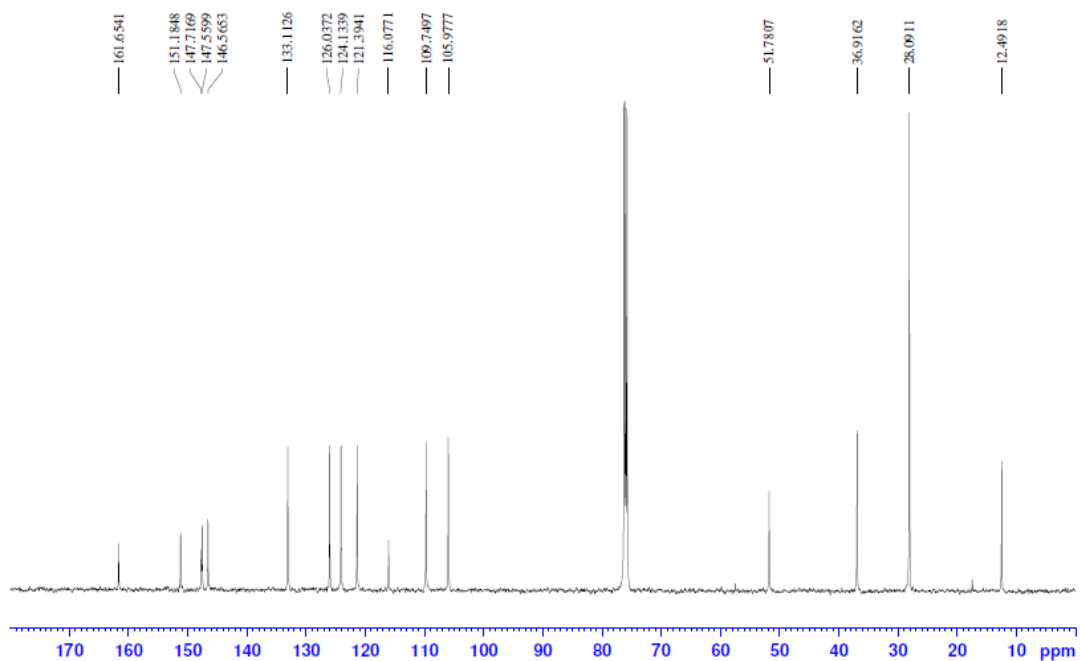

<sup>13</sup>C NMR of compound **4j**

2013-10-26 1H-23 CDCL3 CC-1615 (JF duijiabenan dianhongsuangan shudingjiyijing)

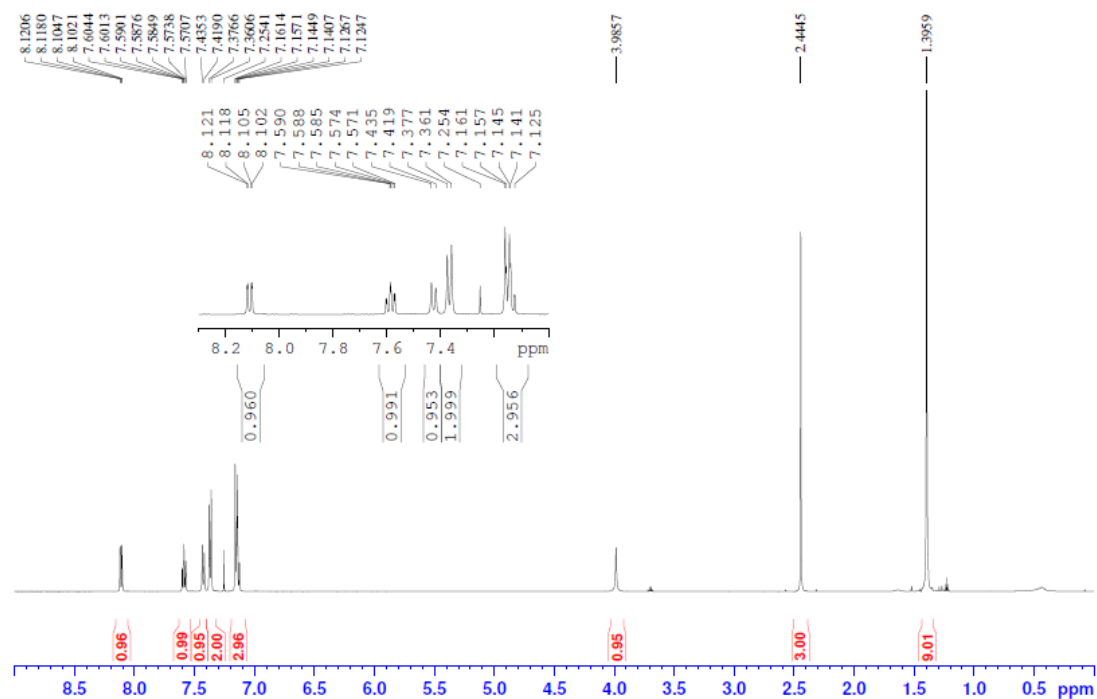

$^1\text{H}$  NMR of compound **4k**

2013-10-26 13C-11 cdcl3 CC-484 (jf-3 dianhongsuangan duijiabenan shudingjiyijing)

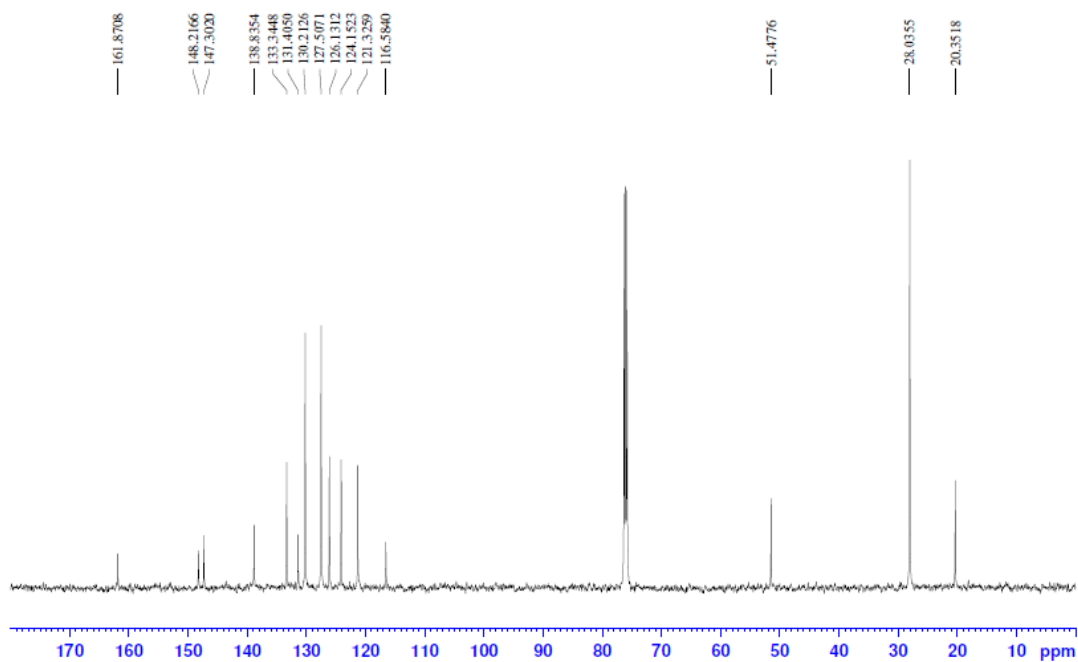

$^{13}\text{C}$  NMR of compound **4k**

2013-11-10 1H-1 CDCL3 CC-1755 (JF-DUILVBENAN)

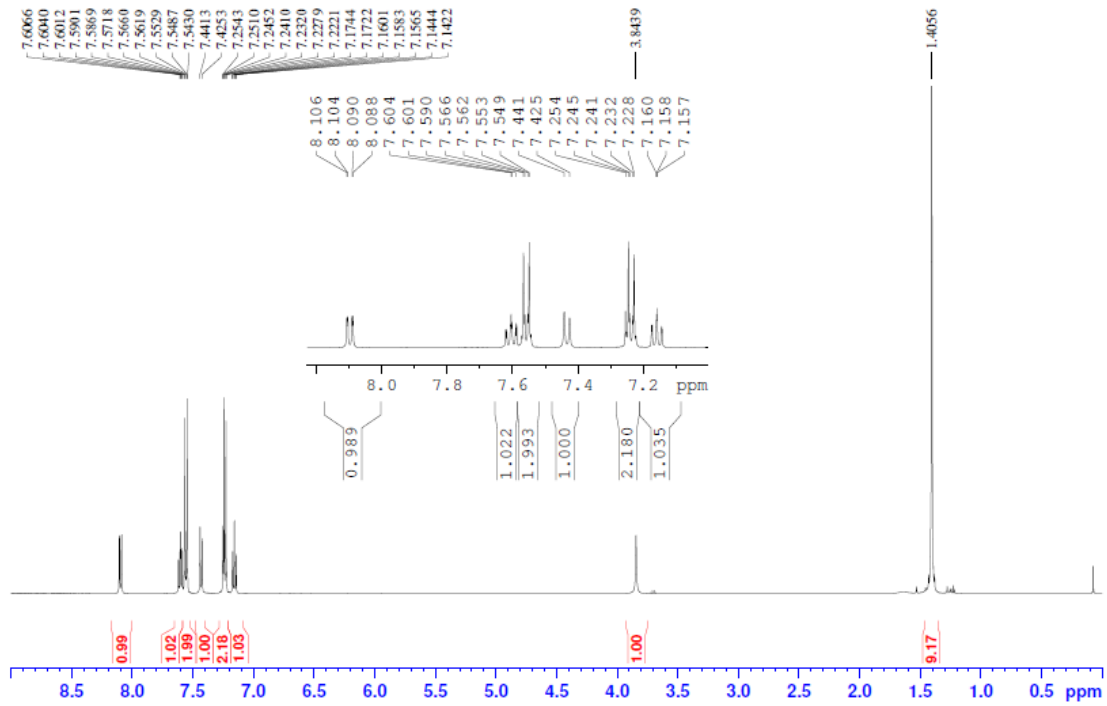

<sup>1</sup>H NMR of compound **4I**

2013-11-10 13C-1 CDCL3 CC-511 (jf-duilvbenan)

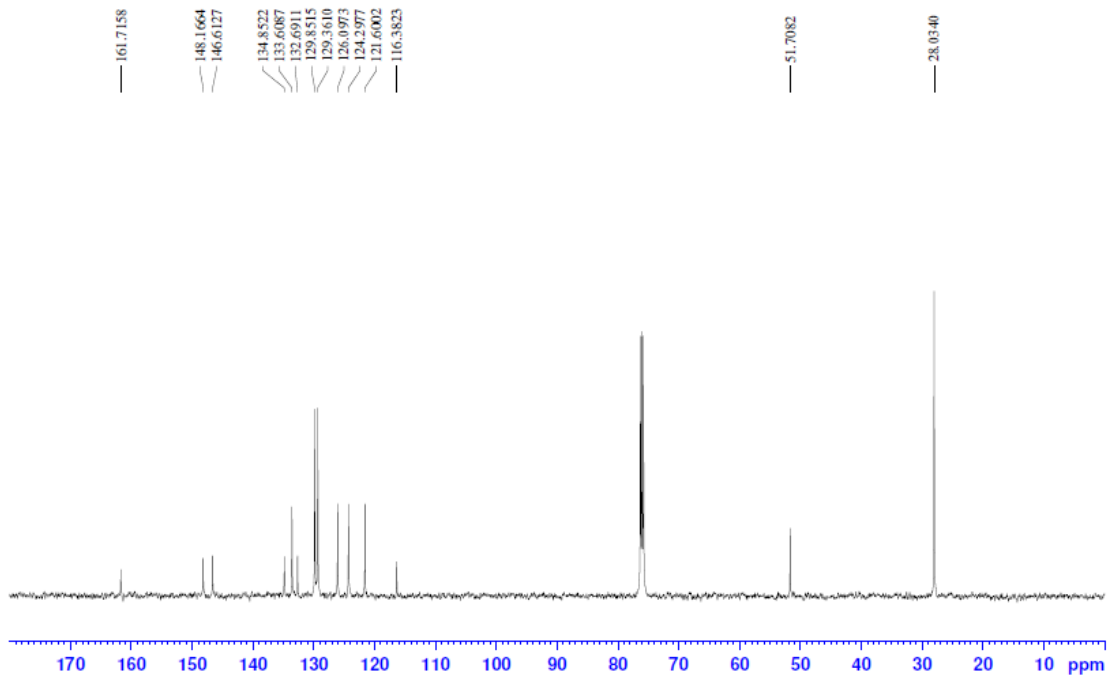

<sup>13</sup>C NMR of compound **4I**

2013-11-24 1H-18 CDCL3 CC-1868 (JF-1 )

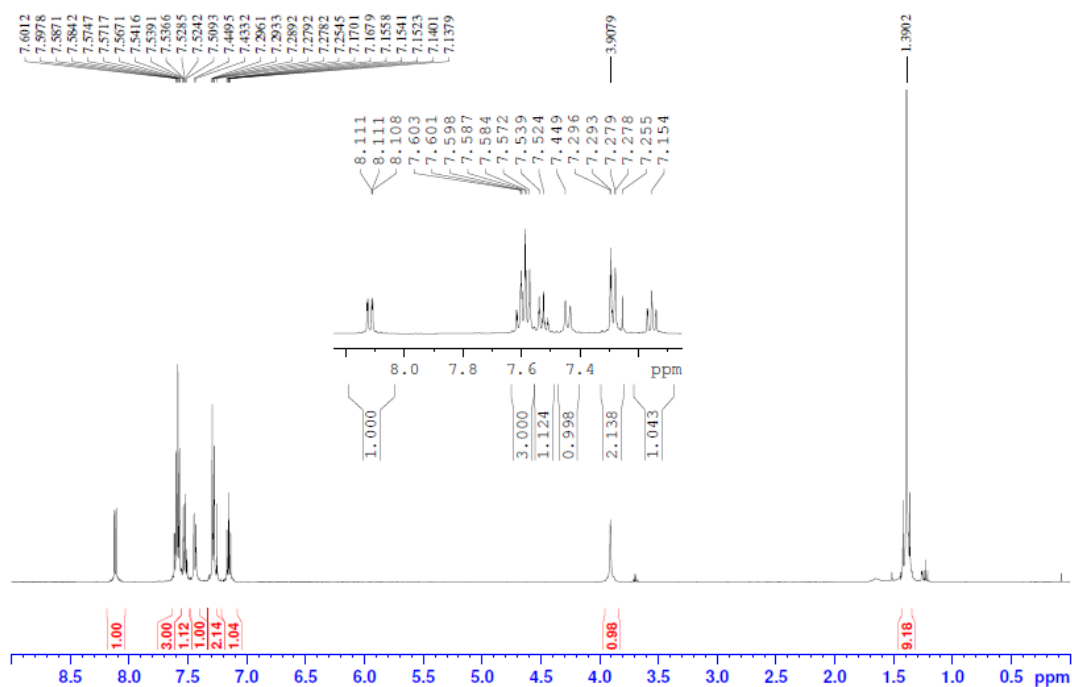

<sup>1</sup>H NMR of compound **4m**

2013-11-24 13C-5 CDCL3 CC-551 (jF-2 dianhongsuangan benan shudingjiyijing)

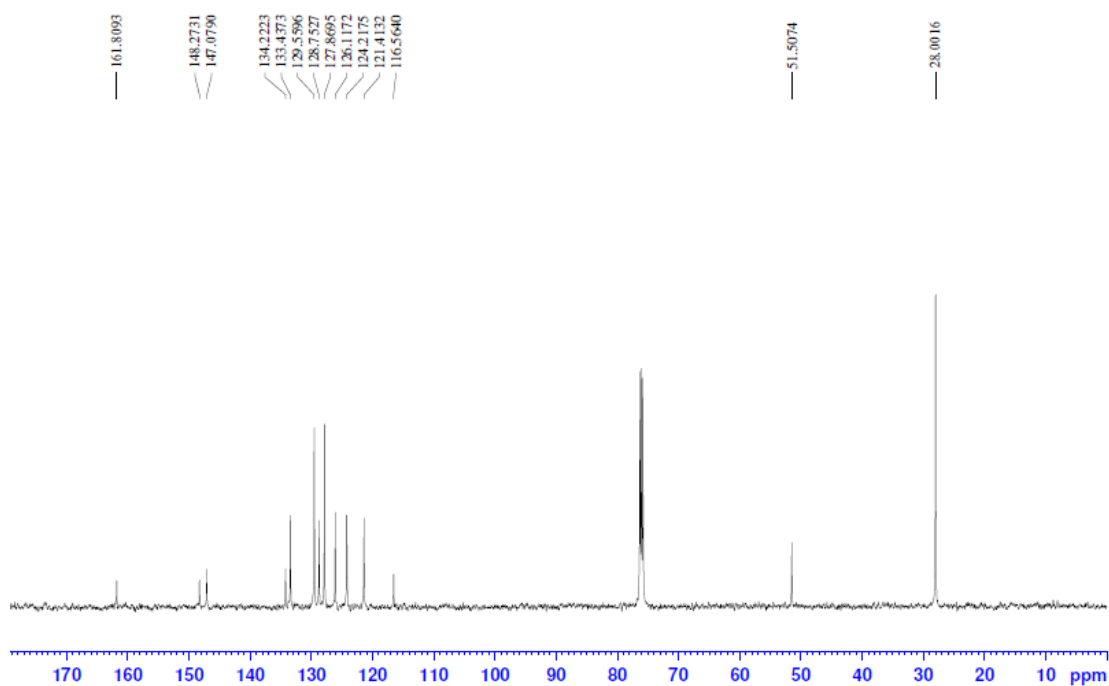

<sup>13</sup>C NMR of compound **4m**

2013-10-19 1H-16 CDCL3 CC-1559 (JF DIANHONGSUANGAN BIANAN 1,1,3,3-SHUDINGJIYIJING)

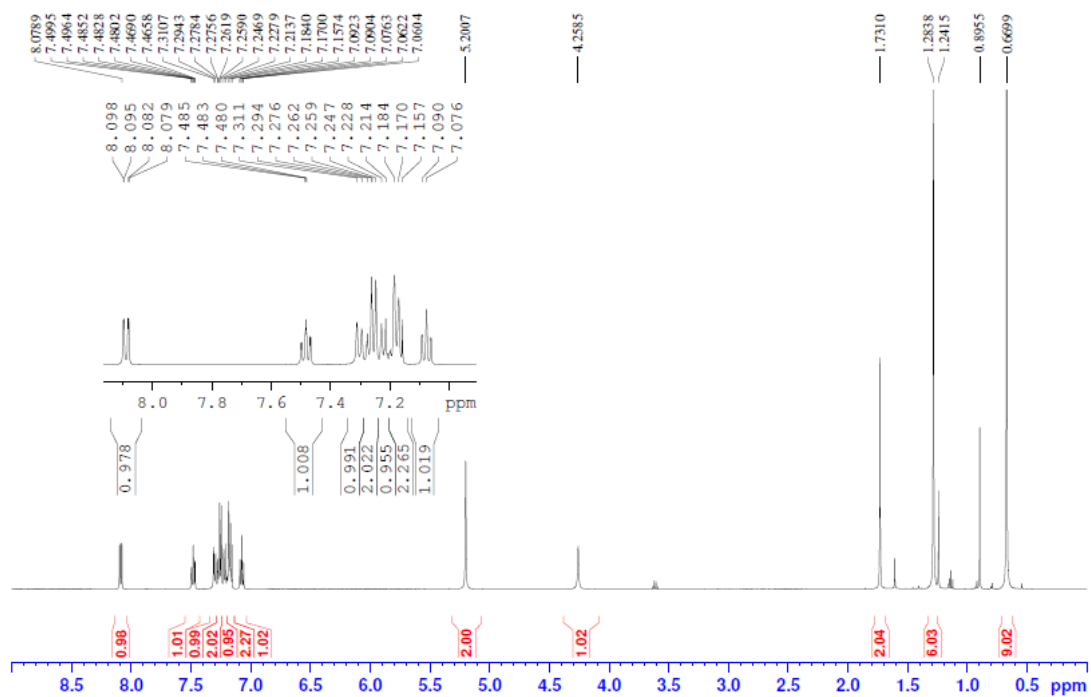

<sup>1</sup>H NMR of compound **4n**

2013-10-19 13C-5 CDCL3 CC-453 (jf-1 dianhongsuangan bianan 1,1,3,3-sijiajizhengdingjiyi)

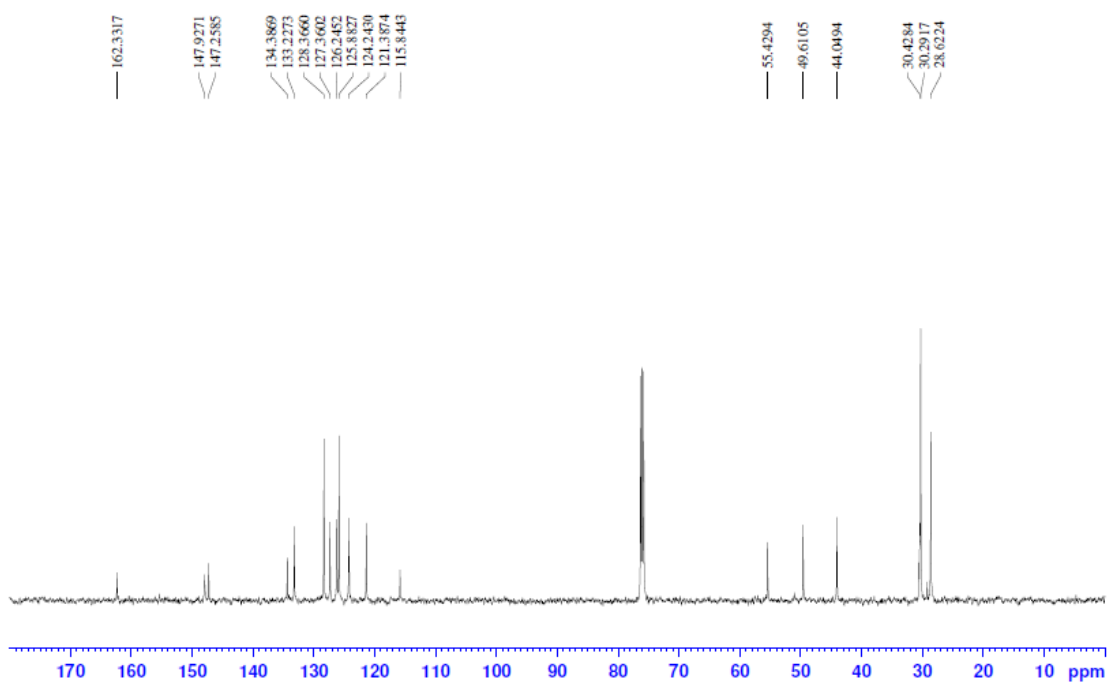

<sup>13</sup>C NMR of compound **4n**

2013-08-31 1H-9 CDCL3 CC-1380 (JF-1 DIANHONGSUANGAN BIANAN SHUDINGJIYIJING)

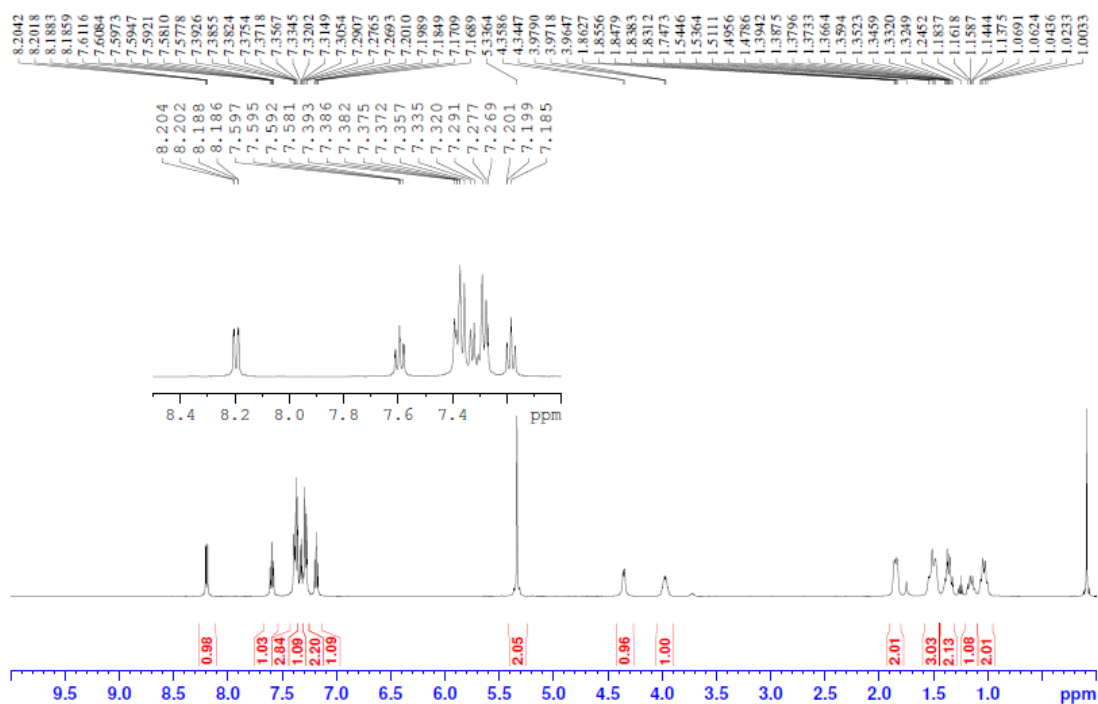

<sup>1</sup>H NMR of compound **4o**

2013-8-31 13C-5 CDCL3 CC-397 (JF-1 DIANHONGSUANGAN BIANAN HUANJJIYIJING)

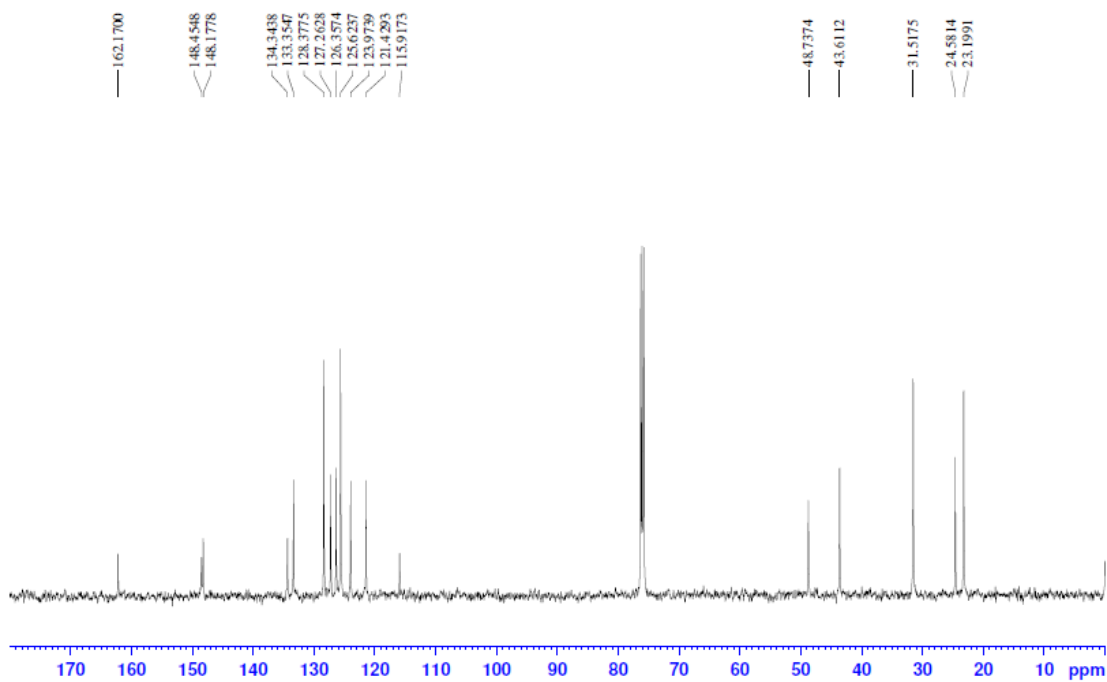

<sup>13</sup>C NMR of compound **4o**



2013-10-26 1H-26 CDCL3 CC-1618(JF bianan dianhongsuangan xinxingyijing)

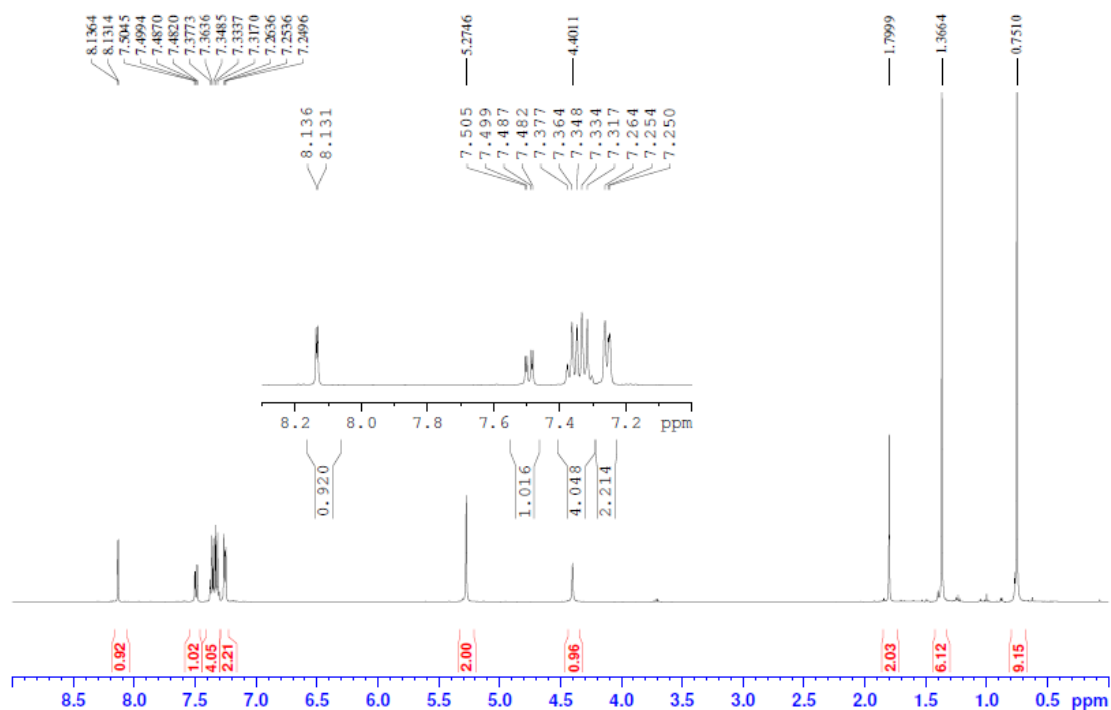

$^1\text{H}$  NMR of compound **4p**

2013-10-26 13C-4 cdcl3 CC-476 (jf-1 5-1vdianhongsuangan bianan xinxingyijing)

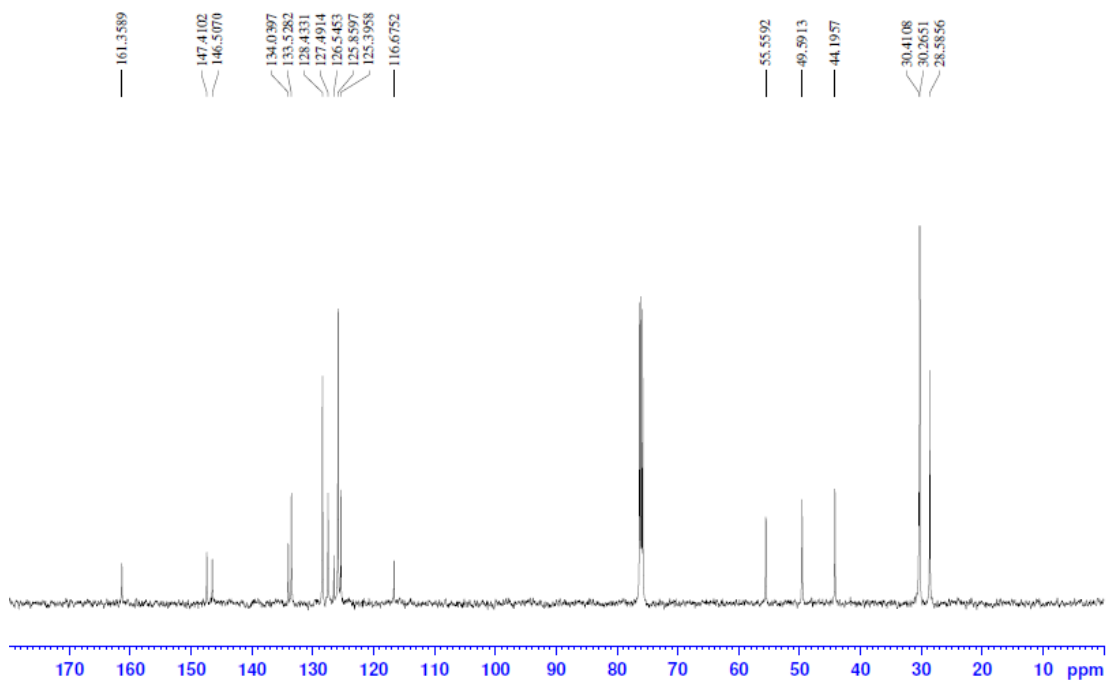

$^{13}\text{C}$  NMR of compound **4p**

2013-10-20 1H-10 CDCL3 CC-1572 (JF-2 5-lvdianhongsuangan bianan shudingjiyijing)

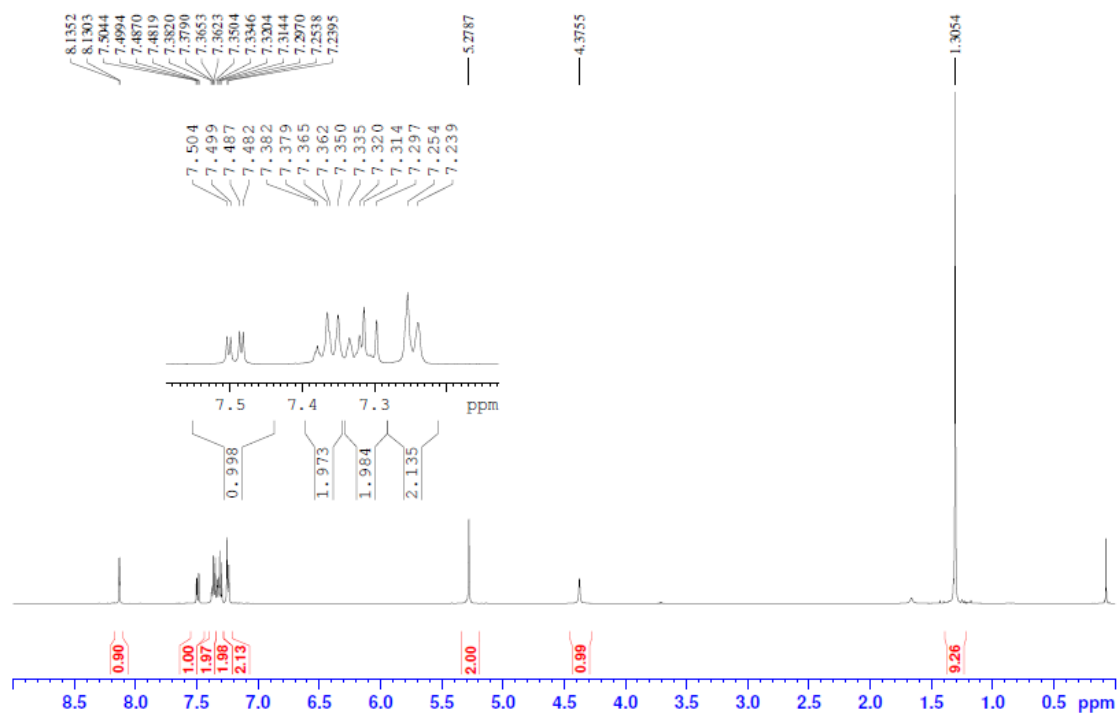

<sup>1</sup>H NMR of compound **4q**

2013-10-20 13C-5 cdcl3 CC-468 (jf-3 5-lvdianhongsuangan bianan shudingjiyijing)

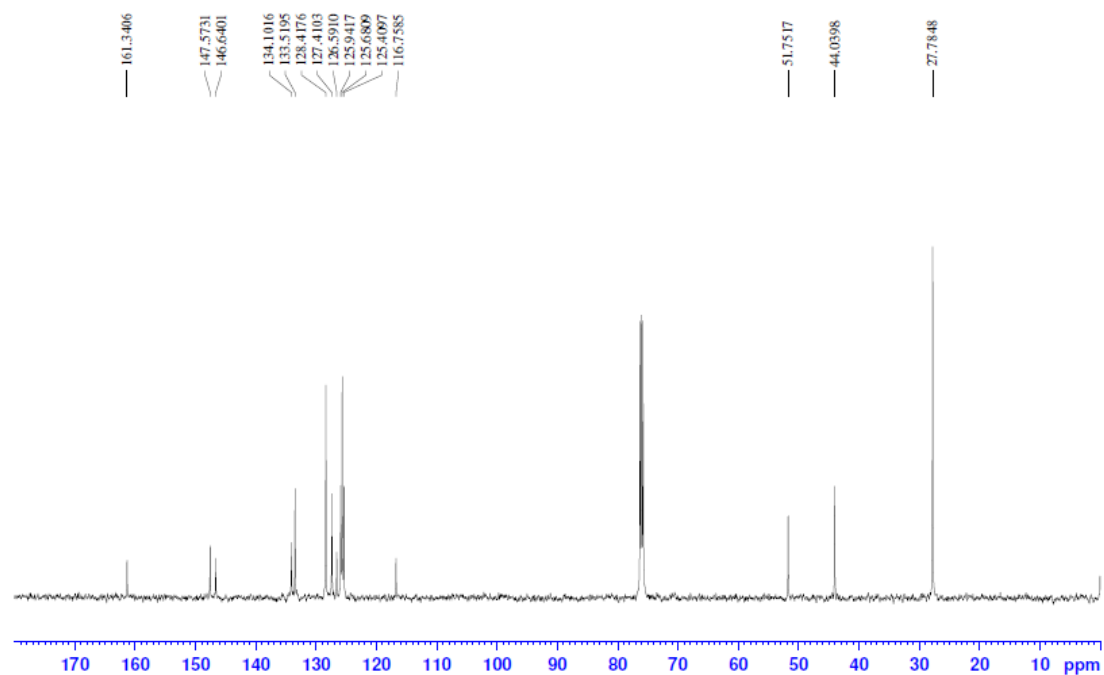

<sup>13</sup>C NMR of compound **4q**

2013-09-08 1H-8 CDCL3 CC-1422 (JF-1)

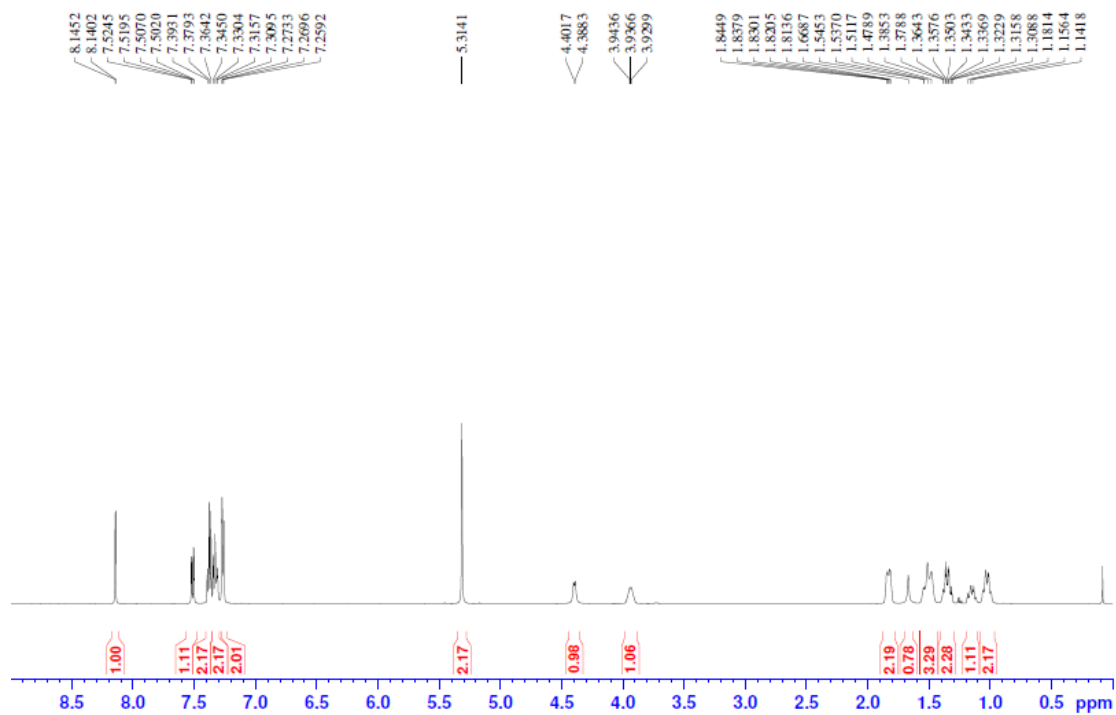

<sup>1</sup>H NMR of compound **4r**

2013-10-12 13C-9 CDCL3 CC-437 (jf-2 2jiajikangan dianhongsuangan shudingyijing )

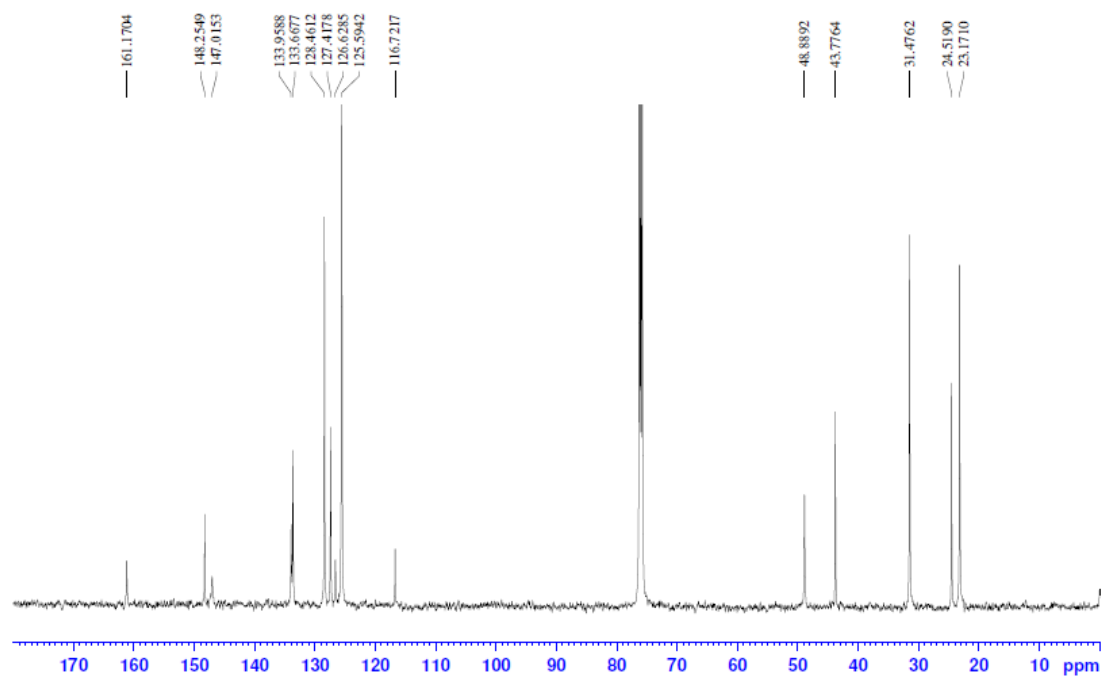

<sup>13</sup>C NMR of compound **4r**

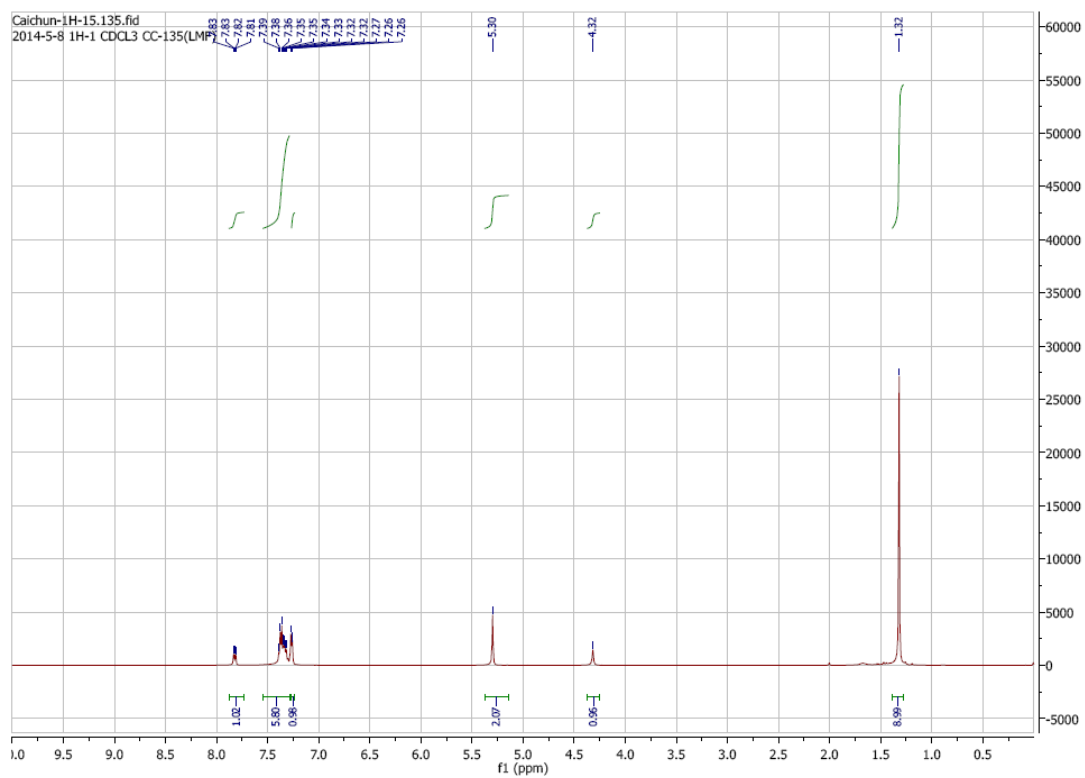

<sup>1</sup>H NMR of compound **4s**

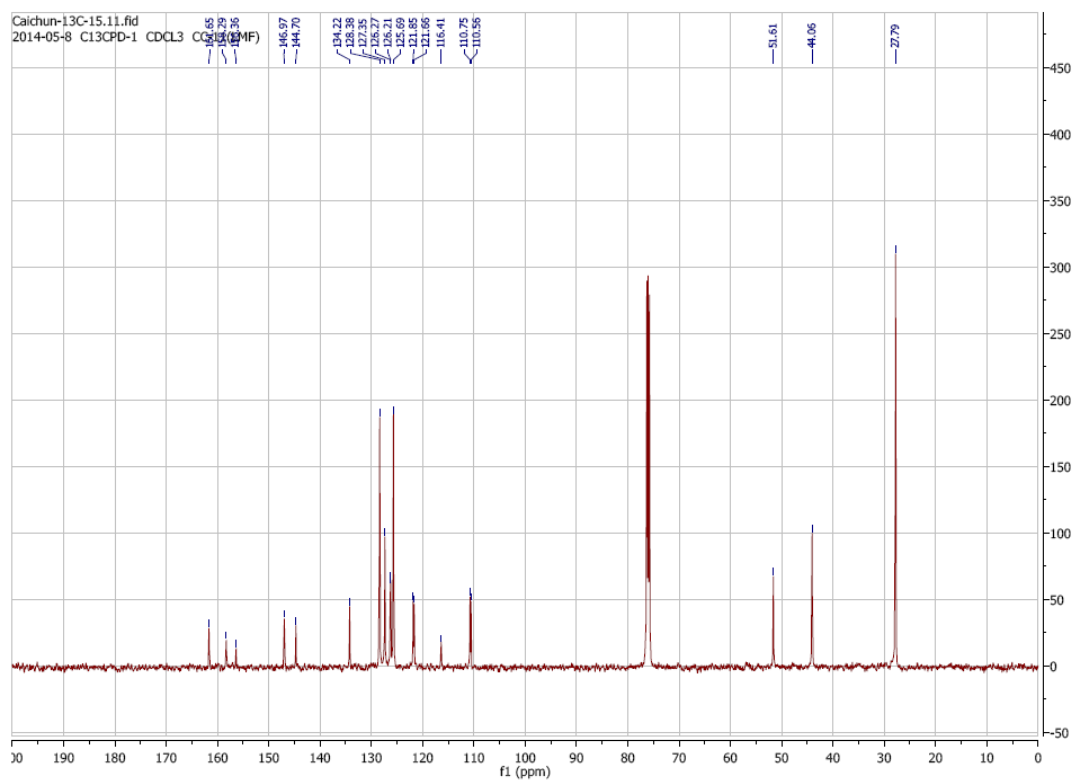

<sup>13</sup>C NMR of compound **4s**

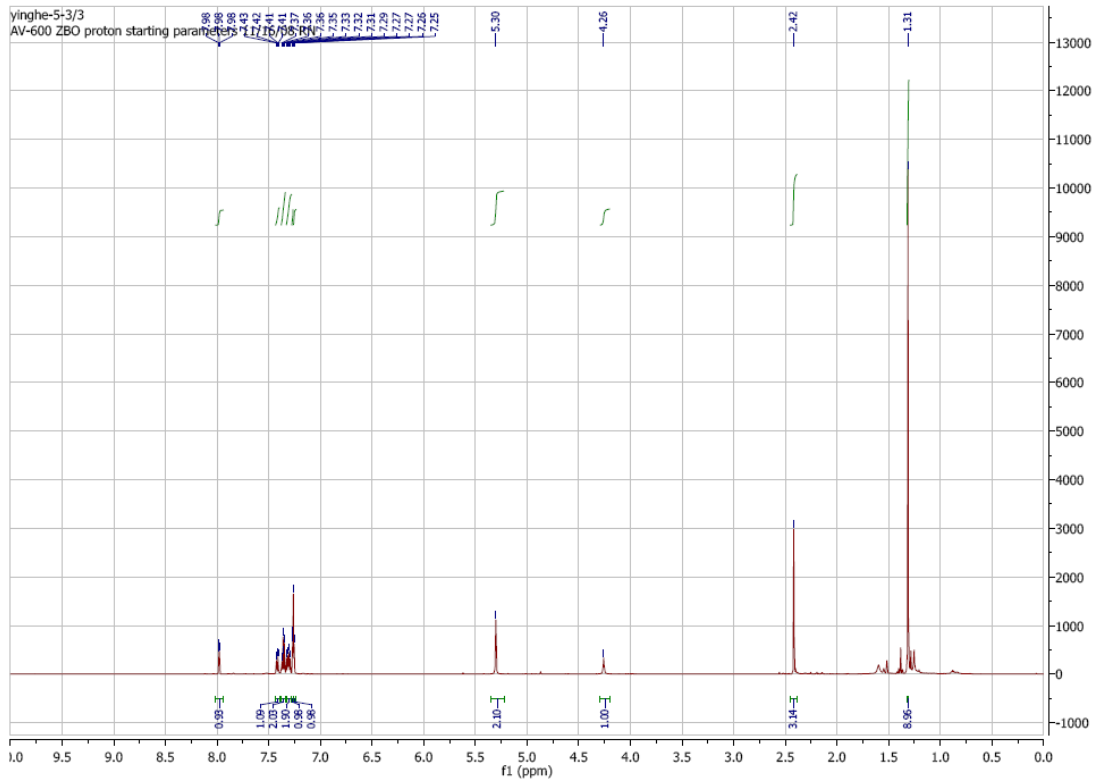

<sup>1</sup>H NMR of compound **4t**

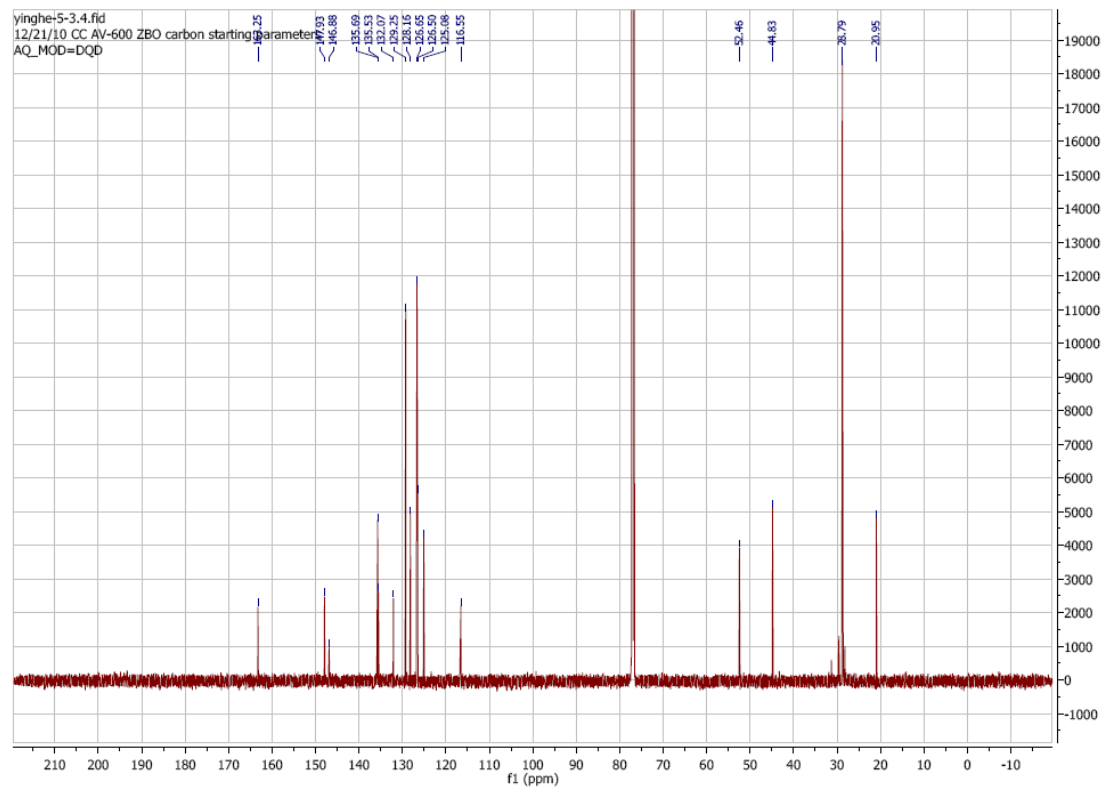

<sup>13</sup>C NMR of compound **4t**

2013-09-21 1H-1 CDCL3 CC-1445 (JF-1)

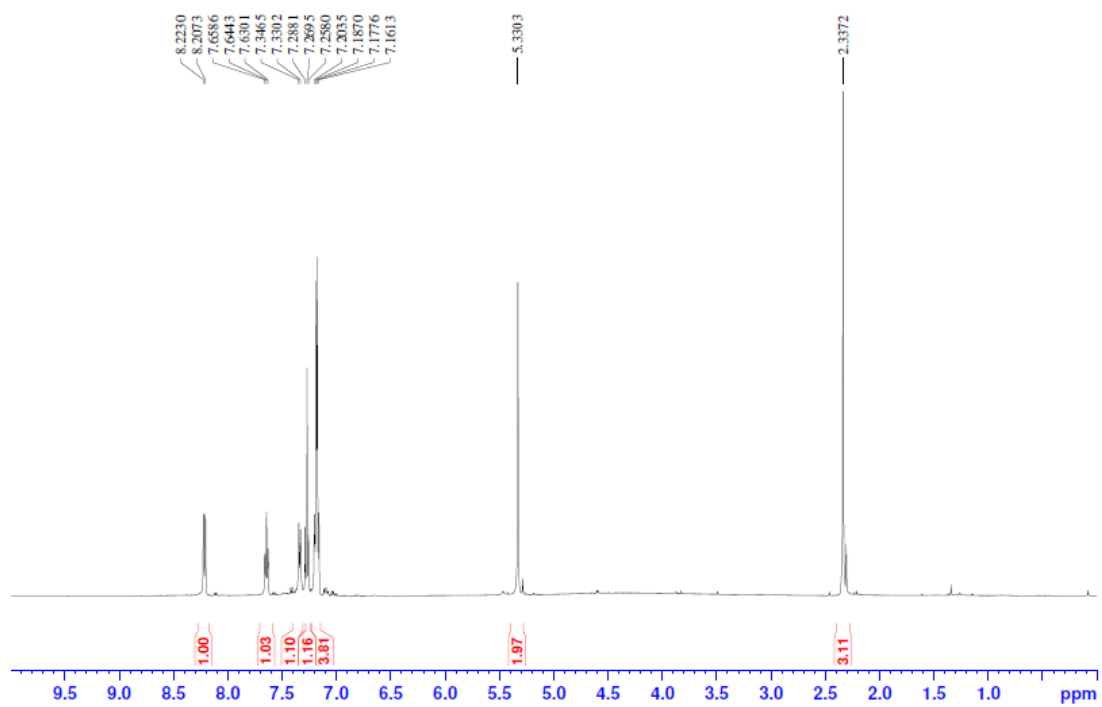

<sup>1</sup>H NMR of compound **4u**

2013-9-21 13C-3 CDCL3 CC-418 (JF-2)

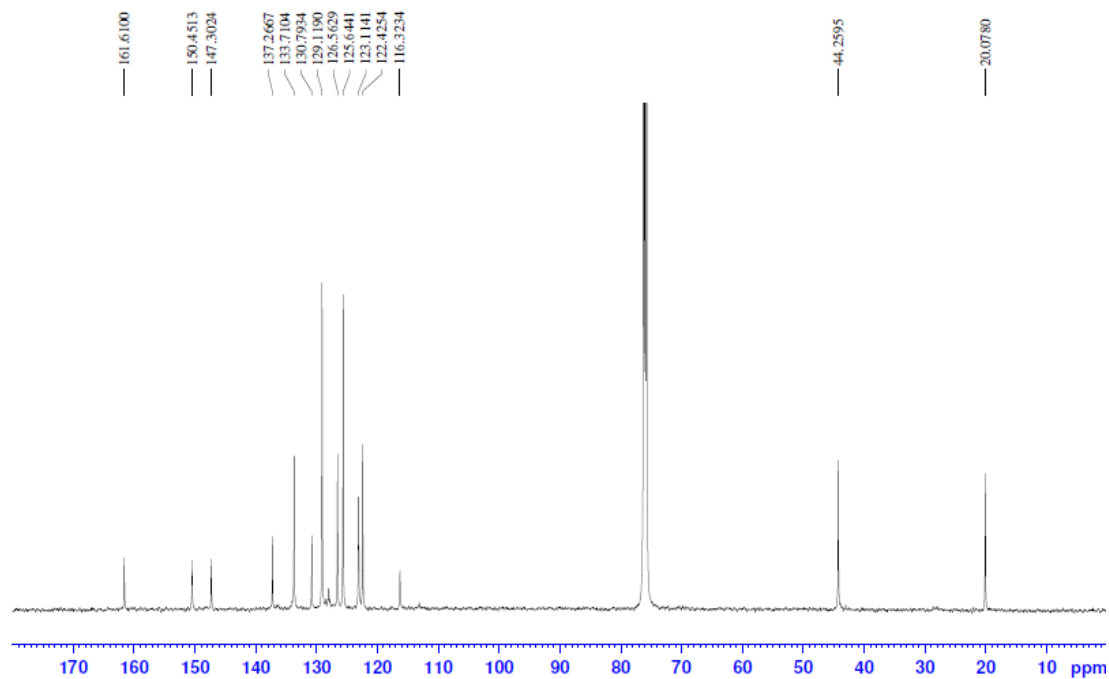

<sup>13</sup>C NMR of compound **4u**

2013-11-16 1H-22 CDCL3 CC-1799(JF-1 BIANJIQIANGAN)

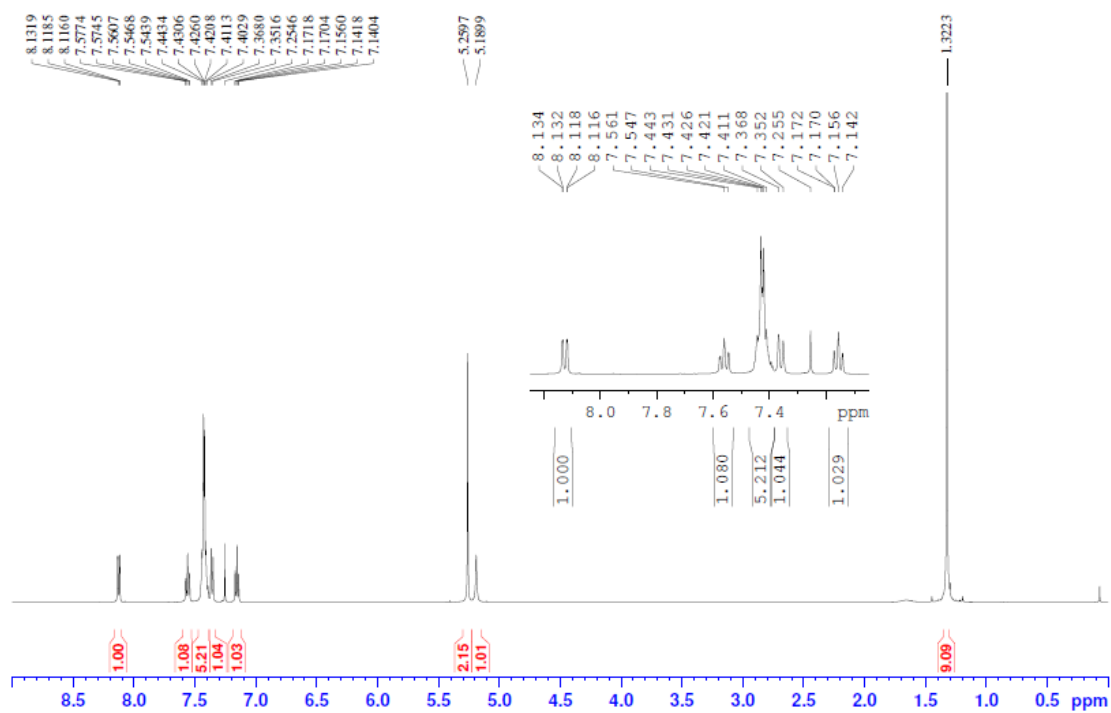

<sup>1</sup>H NMR of compound 4v

2013-11-16 13C-8 CDCL3 CC-528(jf-1 dianhongsuangan bianjiqiangan shudingjiyijing)

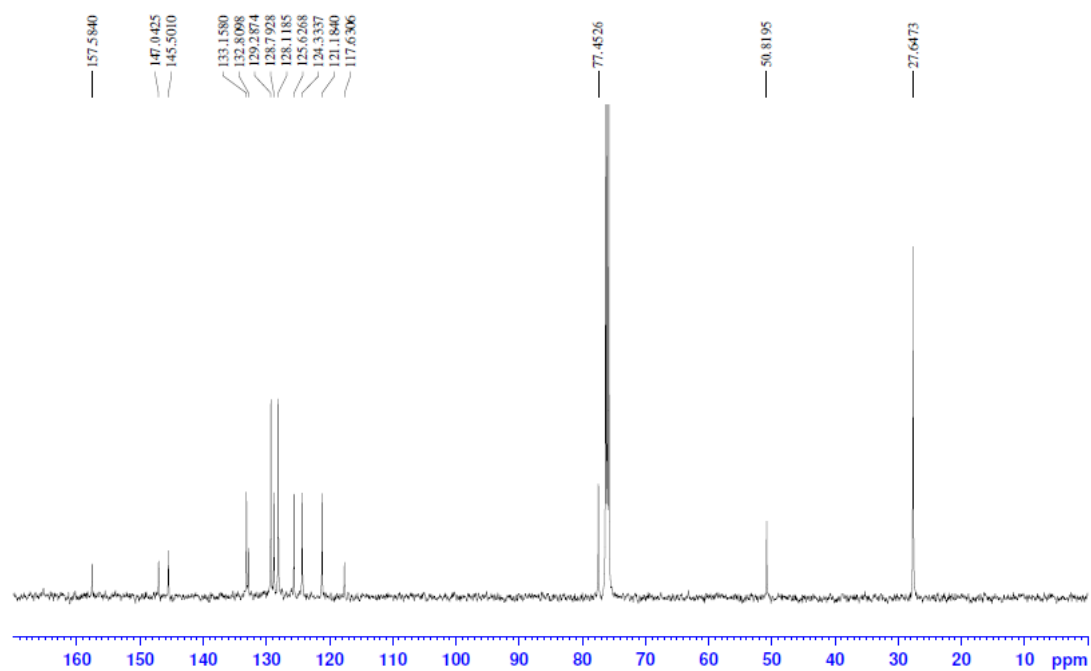

<sup>13</sup>C NMR of compound 4v

2013-11-23 1H-7 CDCL3 CC-1840 (JF-1)

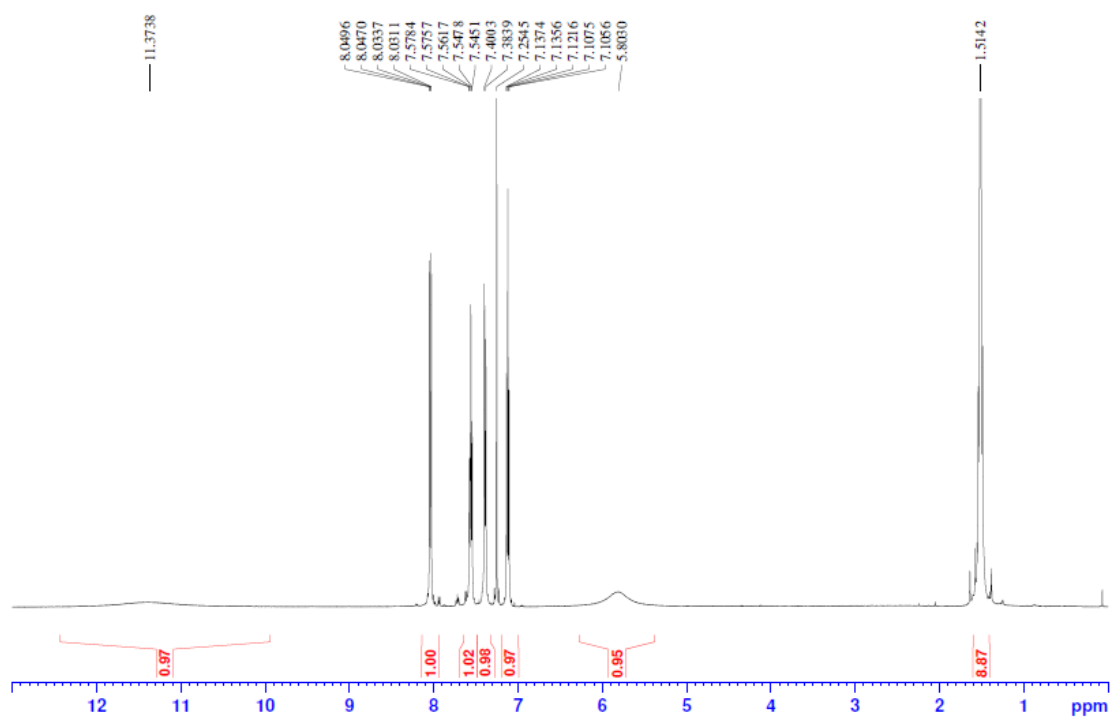

<sup>1</sup>H NMR of compound **4w**

2013-11-23 13C-5 CDCL3 CC-546 (jf-2 dianhongsuangan bianjiqianan shudingjiyijing qinghua)

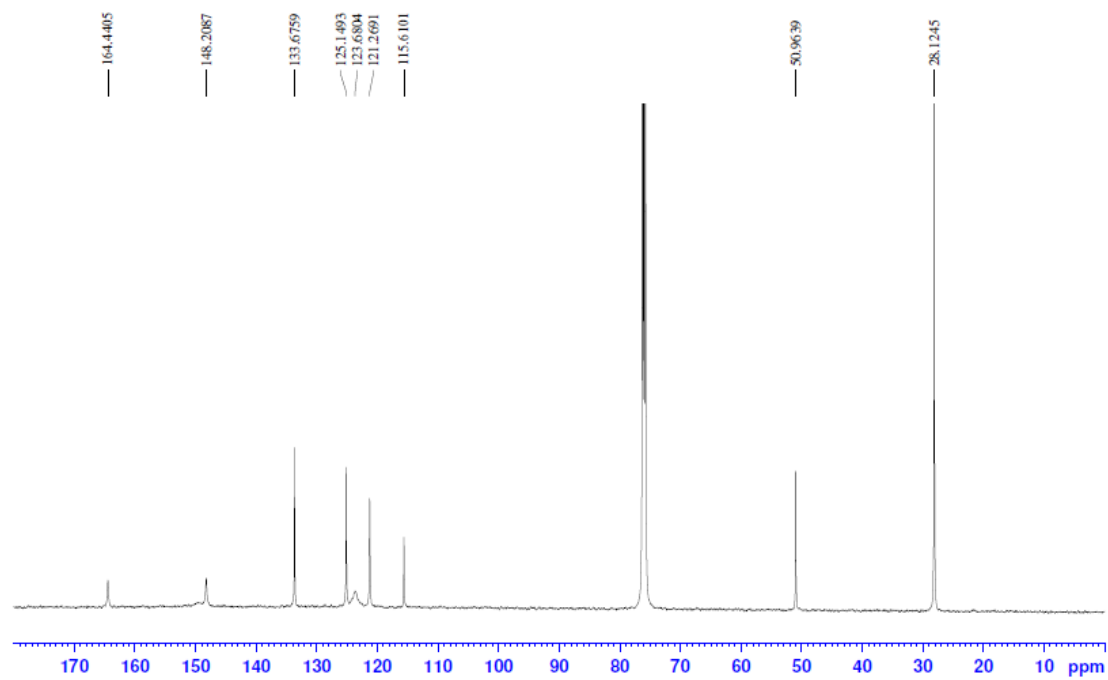

<sup>13</sup>C NMR of compound **4w**



### Single-crystal X-ray analysis of product 4j

Crystallographic data (excluding structure factors) for compound **4j** (CCDC 966928) have been deposited with the Cambridge Crystallographic Data Centre. Crystallographic data of complexes was collected at 296 K on a Bruker SMART CCD system equipped with graphite-monochromated Mo-K $\alpha$  radiation ( $\lambda = 0.071073$  nm) using  $\omega$ - $\phi$  scan technique. Diffraction data were integrated by the SAINT program, which was also used for intensity corrections for Lorentz and polarization effects. Semi-empirical absorption correction was applied using SADABS. The structures were solved by direct methods and all non-hydrogen atoms were refined anisotropically on F<sup>2</sup> by full-matrix least-squares using the SHELXL-97 crystallographic software package.

| complex                                | <b>4j</b>                                                     |
|----------------------------------------|---------------------------------------------------------------|
| Formula                                | C <sub>18</sub> H <sub>21</sub> N <sub>3</sub> O <sub>2</sub> |
| Formula weight                         | 311.38                                                        |
| Crystal system                         | Monoclinic                                                    |
| space group                            | P2(1)/n                                                       |
| a (Å)                                  | 12.3807(10)                                                   |
| b (Å)                                  | 10.2922(8)                                                    |
| c (Å)                                  | 13.3591(10)                                                   |
| $\alpha$ (°)                           | 90.00                                                         |
| $\beta$ (°)                            | 102.8390(10)                                                  |
| $\gamma$ (°)                           | 90.00                                                         |
| Volume(Å <sup>3</sup> )                | 1659.7(2)                                                     |
| Z                                      | 4                                                             |
| T, (K)                                 | 296(2)                                                        |
| D <sub>calcd</sub> (g/m <sup>3</sup> ) | 1.246                                                         |
| F(000)                                 | 664                                                           |
| Reflections collected                  | 3094                                                          |
| Unique reflections                     | 2409                                                          |
| Goof                                   | 1.028                                                         |
| R <sub>1</sub> [I > 2 $\sigma$ (I)]    | 0.0412                                                        |
| wR <sub>2</sub> [I > 2 $\sigma$ (I)]   | 0.1086                                                        |
| CCDC number                            | CCDC 966928                                                   |

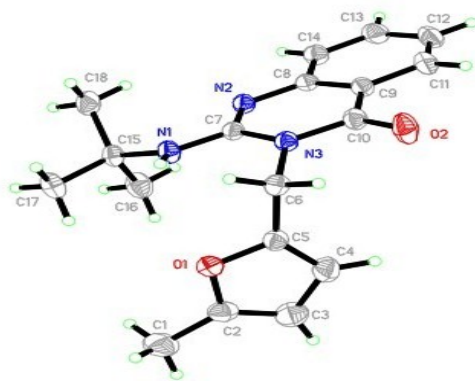

Single-crystal X-ray analysis of **4j**
